1 **FiNuTyper: an automated deep learning-based platform for simultaneous fiber and**  
2 **nucleus type analysis in human skeletal muscle**

3

4 August Lundquist<sup>1\*</sup>, Enikő Lázár<sup>1\*</sup>, Nan Sophia Han<sup>1</sup>, Eric B Emanuelsson<sup>2</sup>, Stefan M  
5 Reitzner<sup>2,3</sup>, Mark A Chapman<sup>2,4</sup>, Kanar Alkass<sup>1,5</sup>, Henrik Druid<sup>5</sup>, Susanne Petri<sup>6</sup>, Carl Johan  
6 Sundberg<sup>2,7</sup>, Olaf Bergmann<sup>1,8§</sup>

7

8 <sup>1</sup>Department of Cell and Molecular Biology; Karolinska Institutet; Stockholm, 171 77; Sweden

9 <sup>2</sup>Department of Physiology and Pharmacology; Karolinska Institutet; Stockholm, 171 65;  
10 Sweden

11 <sup>3</sup>Department for Women's and Children's Health, Karolinska Institutet, Stockholm, 17177  
12 Sweden

13 <sup>4</sup>Department of Integrated Engineering, University of San Diego, San Diego, USA

14 <sup>5</sup>Department of Oncology-Pathology; Karolinska Institutet; Stockholm, 171 64 Sweden

15 <sup>6</sup>Department of Neurology; Hanover Medical School; Hanover, 30625; Germany

16 <sup>7</sup>Department of Learning, Informatics, Management and Ethics, Karolinska Institutet,  
17 Stockholm 171 77, Sweden

18 <sup>8</sup>Center for Regenerative Therapies Dresden; Technische Universität Dresden; Dresden, 01307;  
19 Germany

20 \* Shared first author

21 § Corresponding author

22

23 Corresponding author: Olaf Bergmann [olaf.bergmann@ki.se](mailto:olaf.bergmann@ki.se)

24

25

## 26 **Highlights**

- 27 • A deep learning-based automated platform for skeletal muscle microscopic analysis
- 28 • High-fidelity identification and characterization of myonuclei and myofibers
- 29 • Validation of SERCA1 and SERCA2 as markers for myofiber and myonuclear subtypes
- 30 • Characterization of healthy and pathological human skeletal muscle tissue features
- 31 • Adaptations provided for studies on other resident cell types like satellite cells

32

## 33 **eTOC Blurb**

34 An automated platform for unbiased analysis of skeletal muscle immunohistochemical images,  
35 focusing on type-specific myofiber-myonucleus relationships, facilitating high-throughput  
36 studies of healthy and diseased tissues.

37

## 38 **Summary (150 words)**

39 While manual quantification is still considered the gold standard for skeletal muscle histological  
40 analysis, it is time-consuming and prone to investigator bias. We assembled an automated  
41 image analysis pipeline, FiNuTyper (Fiber and Nucleus Typer), from recently developed deep  
42 learning-based image segmentation methods, optimized for unbiased evaluation of fresh and  
43 postmortem human skeletal muscle. We validated and utilized SERCA1 and SERCA2 as type-  
44 specific myonucleus and myofiber markers. Parameters including myonuclei per fiber,  
45 myonuclear domain, central myonuclei per fiber, and grouped myofiber ratio were determined  
46 in a fiber type-specific manner, revealing a large degree of gender- and muscle-related  
47 heterogeneity. Our platform was also tested on pathological muscle tissue (ALS) and adapted  
48 for the detection of other resident cell types (leukocytes, satellite cells, capillary endothelium).  
49 In summary, we present an automated image analysis tool for the simultaneous quantification  
50 of myofiber and myonuclear types, to characterize the composition of healthy and diseased  
51 human skeletal muscle.

52

53 **Keywords**

54 Skeletal muscle, myonuclei, myofibers, SERCA, automated image analysis

## 55 **Introduction**

56 Histological analysis of muscle structures is crucial for understanding basic muscle physiology  
57 and the tissue's involvement in various pathological conditions. Fundamental research utilizing  
58 skeletal muscle histological analysis include studies on exercise, age-related and spaceflight-  
59 associated changes in the musculature <sup>1-8</sup>, but also different forms of dystrophies and  
60 neuromuscular disorders, such as amyotrophic lateral sclerosis (ALS) and Parkinson's disease  
61 <sup>9,10</sup>. Several automated platforms have been developed to investigate skeletal muscle samples  
62 in an unbiased fashion, with the potential to analyze them in a high-throughput format. These  
63 approaches allow for the measurement of size, shape, and type of myofibers in  
64 immunohistochemical images <sup>11-24</sup> (Suppl. Table 1). Recently, the ability to measure  
65 capillarization and model oxygen consumption for individual myofibers <sup>12</sup> and satellite cell  
66 identification <sup>11</sup> has been added to this toolbox. However, only a few of these automated  
67 pipelines allow for simultaneous fiber and myonucleus assignment, based exclusively on the  
68 position of the nuclei compared to fiber borders <sup>16,20</sup>. Routine introduction of myocyte-specific  
69 nuclear markers in skeletal muscle histological analysis has been suggested to substantially  
70 improve the accuracy and reliability of these types of studies. To date, however, only one such  
71 marker has been thoroughly validated in human muscle samples <sup>25</sup>, and without the direct  
72 assignment of myonuclei to a particular fiber type population, its usefulness in studying  
73 myofiber-myonucleus relationship is limited <sup>5,8,26,27</sup>.

74 Here, we present and validate FiNuTyper, a robust automated platform employing deep  
75 learning-based object recognition, for skeletal muscle histological analysis. This novel tool,  
76 designed for identifying and quantifying fiber and myonuclear phenotypes, has been optimized  
77 for fresh biopsies of healthy and pathological muscle tissue and postmortem samples. In  
78 addition, we introduce and validate sarcoplasmic/endoplasmic reticulum calcium ATPase 1  
79 (SERCA1) and 2 (SERCA2) as novel, fiber type-specific myonuclear markers, allowing for  
80 simultaneous discrimination of fibers and nuclei of type 2 and type 1 phenotype, respectively.

81 Using SERCA1- and SERCA2-specific antibodies in combination with cell membrane and  
82 nuclear labeling, we established a simple multicolor immunostaining panel for identification  
83 and characterization of myocytes and nuclei in human skeletal muscle sections (Fig. 1A). From  
84 a set of microscopic images, myofiber and nuclear objects are identified, and subsequently  
85 labeled and quantified as type 1 (slow-twitch) or type 2 (fast-twitch), based on their SERCA  
86 isoform expression and, in the case of nuclei, also on their vicinity to muscle fibers of the same  
87 type. From this information, parameters such as fiber size distribution, number of myonuclei  
88 and central myonuclei per fiber, myonuclear domain size (cross-sectional fiber area per  
89 myonucleus) and proportion of grouped fibers can be derived separately for both major fiber  
90 types (Fig. 1B). In summary, this platform provides a tool for high-throughput histological  
91 analysis of the most relevant characteristics of human skeletal muscle in a fiber type-specific  
92 manner, facilitating the investigation of skeletal muscle biology in homeostasis and disease.

## 93 **Results**

### 94 **SERCA1 and SERCA 2 are fiber type-specific myonuclear markers**

95 We aimed to establish a simple immunostaining design for the simultaneous, type-specific  
96 identification of both myofibers and myonuclei in human skeletal muscle tissue sections,  
97 adapted for a classical 4-channel imaging setup available in most fluorescent microscopes. Until  
98 now, no myonuclear marker has been described to assign labeled myonuclei to distinct fiber  
99 types. Antibodies against slow- and fast-twitch myosin heavy chain isoforms (MyHC1 and  
100 MyH2A-2X, respectively), classically used for fiber type determination in human skeletal  
101 muscle studies, do not provide a nuclear or perinuclear signal in myofibers. To overcome this  
102 challenge, we investigated the potential use of sarcoplasmic reticulum Ca<sup>2+</sup> pump proteins  
103 SERCA1 and SERCA2 as fast- and slow-twitch myofiber and myonuclear markers in human  
104 skeletal muscle, respectively. SERCA1 and SERCA2 have been described to show fiber type-  
105 specific expression patterns, consistent with the MyHC isoform distribution <sup>28</sup>. Since the  
106 sarcoplasmic reticulum membrane is continuous with the nuclear envelope, we hypothesized  
107 that SERCA1 and SERCA2 could be detected in a distinct perinuclear localization besides the  
108 sarcoplasmic reticulum membrane, allowing for the identification of both nuclei and fibers of  
109 different types in the same section. First, we tested our staining design on transversal sections  
110 of postmortem human psoas and pectoralis muscles, combining antibodies against the two  
111 SERCA protein isoforms, WGA as cell membrane marker and DAPI as a nuclear stain (Fig.  
112 2A). Most fibers, surrounded by a defined WGA signal, were labeled either by SERCA1 or  
113 SERCA2 only, however, we also observed fibers simultaneously expressing both SERCA  
114 isoforms, suggesting an intermediate phenotype (Fig. 2A).

115 Both SERCA1 and SERCA2 were present in the entire area of the labeled myofibers, in  
116 a localization presumably consistent with the position of the sarcoplasmic reticulum (Fig. 2B).  
117 Moreover, we detected a distinct perinuclear signal with SERCA1 and SERCA2-specific  
118 antibodies in the respective myofibers (Fig. 2B). We confirmed the close spatial association of

119 this signal with the nuclear membrane, by co-staining with lamin A/C- and SERCA1- or  
120 SERCA2-specific antibodies (Fig. 2B).

121 We did not detect any specific SERCA1 or SERCA2 staining in a similar intensity range  
122 in non-myocytes outside of the myofiber borders, either in cells dispersed between myocytes  
123 (Suppl. Fig. 1A) or more substantial connective tissue borders and vessel walls (Suppl. Fig.  
124 1B), confirming the signal to be highly specific to myofibers and myonuclei. Satellite cells are  
125 located between the sarcolemma and basal membrane surrounding myofibers, and as such,  
126 could potentially be detected inside the fiber borders defined by the WGA signal. However, we  
127 observed no specific SERCA1 or SERCA2 signal around PAX7-labelled satellite cell nuclei  
128 (Suppl. Fig. 1C), further confirming their specificity to myonuclei in human skeletal muscle.

129 To assess the relationship between the expression patterns of type 1- or type 2-specific  
130 SERCA and MyHC isoforms, we performed co-staining with combinations of MyHC1-,  
131 MyHC2A-2X-, and SERCA1- or SERCA2-specific antibodies (Fig. 3A) on consecutive tissue  
132 sections and plotted the mean signal intensities in three parallel channels, measured in  
133 individual fibers (Fig. 3B and 3C). The classical fiber type markers MyHC1 and MyHC2A-2X  
134 showed complementary expression patterns with little to no overlap, pointing to a low  
135 abundance of hybrid fibers in the analyzed samples (Fig. 3A). Most fibers were either co-  
136 labeled or not labeled by the combination of the type 2-specific SERCA1 and MyHC2A-2X  
137 (Fig. 3A, B) and the type 1-specific SERCA2 and MyHC1 antibodies (Fig. 3A, C),  
138 corroborating the close association between SERCA and MyHC isoform expression. Moreover,  
139 we evaluated the reliability of SERCA1 and SERCA2 as fiber type-specific markers by  
140 comparing SERCA-based individual fiber assignment to type 1 and type 2 populations to that  
141 based on the MyHC isoform expression pattern, currently considered the gold standard of fiber  
142 type analyses (Fig. 3D, E). Based on the dataset collected from postmortem psoas tissue of three  
143 subjects covering a wide age range (25, 45 and 73 years) and a stringent gating strategy based  
144 on the position of a clearly defined double-positive fiber population, we found both SERCA1

145 and SERCA2 to be highly sensitive ( $99.71 \pm 0.30\%$  and  $100 \pm 0.00\%$ , mean  $\pm$  SD, respectively)  
146 and specific ( $98.77 \pm 1.35\%$  and  $98.91 \pm 1.21\%$ , mean  $\pm$  SD, respectively) markers of type 2  
147 and type 1 myofibers (Fig. 3F), independent from the age of the individual.

148

#### 149 **FiNuTyper quantifies skeletal muscle microscopy images with high accuracy**

150 After confirming that the sarcoplasmic reticulum- and nuclear envelope-associated SERCA1  
151 and SERCA2 signals allow for simultaneous myofiber- and nucleotyping, we designed a simple  
152 immunostaining panel to stain transversal sections of human skeletal muscle, using antibodies  
153 against the two SERCA isoforms, combined with fluorescently conjugated WGA as cell  
154 membrane marker and DAPI as a nuclear stain (Fig. 1A). Confocal microscopy images,  
155 captured from sections processed with this panel, were submitted to FiNuTyper, our automated  
156 image analysis pipeline, built on the recently reported image segmentation tools CellPose<sup>29</sup> and  
157 NucleAIzer<sup>30</sup>. Since the primary output of any fiber- or nucleotyping approach is the number  
158 of identified objects and fiber cross-sectional area values, we sought to benchmark our  
159 automated tool against manual evaluation, by deriving these parameters from the same image  
160 sets and comparing the obtained results.

161 We assessed the accuracy of FiNuTyper-based fiber (Fig. 4A) and myonuclear  
162 identification (Fig. 4B) on frozen sections of fresh vastus lateralis muscle and postmortem psoas  
163 major and pectoralis major muscle, by calculating intraclass correlation coefficients (ICC, 95%  
164 confidence interval) between the output values of the manual and automated analyses.  
165 FiNuTyper displayed an ICC of 0.977 (0.962-0.987) for fiber identification in the postmortem  
166 and 0.985 (0.923-0.997) in the fresh biopsy image sets, confirming an excellent agreement  
167 between the two independent approaches (Fig. 4A). The high level of accordance between  
168 FiNuTyper-based and manual evaluation was also upheld when performing myonuclear  
169 identification in the bioptic samples, with an ICC of 0.912 (0.641-0.980) (Fig. 4B). While still  
170 showing a good overall correlation, we obtained more variable results in the postmortem dataset



171 with an ICC of 0.790 (0.268-0.918) (Fig. 4B). This is likely due to different postmortem  
172 intervals and thus, varying tissue quality of the analyzed samples, which seems to have a more  
173 pronounced effect on the reliability of nucleotyping than of fibertyping.

174 Since type 1 and type 2 fibers often respond to physiological and pathological challenges  
175 by changing their sizes and shapes differently, we decided to validate the automated fiber cross-  
176 sectional area (CSA) determination by FiNuTyper (Fig. 4C, D) on a fiber type basis in both  
177 postmortem and fresh bioptic samples, against manual measurements. Our analysis revealed a  
178 very strong correlation between the manually collected and automatically generated mean CSA  
179 values, independent of the fiber type or source of the tissue sample (ICC of type 1 fiber CSA  
180 measurements in postmortem tissue: 0.997 (0.990-0.999) and in bioptic tissue: 0.988 (0.947-  
181 0.998); ICC of type 2 fiber CSA measurements in postmortem tissue: 0.985 (0.969-0.993) and  
182 in bioptic tissue: 0.982 (0.855-0.997)). We performed Bland-Altman analysis on the validation  
183 dataset and displayed the results along with the 95% limit of agreement values (Suppl. Fig. 3A-  
184 D). We also evaluated the cross-sectional area at the level of individual fibers within a single  
185 image scan and found a highly similar fiber size distribution between the manual and automated  
186 output (Fig. 4E), further confirming the reliability of CSA measurements performed by  
187 FiNuTyper.

188

### 189 **Gender, muscle, and fiber type determine myocyte and myonuclear characteristics**

190 To demonstrate the advantages of FiNuTyper in the analysis of larger image sets, we processed  
191 paired samples of postmortem psoas major and pectoralis major muscles of five male and five  
192 female individuals, deceased between 44 and 55 years of age, and submitted three image scans  
193 (9 stitched frames, approx. 0.9 x 0.9 mm<sup>2</sup>) taken from distinct areas of each muscle sample to  
194 the automated pipeline. In total, we identified and analyzed approximately 15600 (780.5 ± 70.7  
195 per muscle sample, mean ± SD) muscle fibers and 12500 (625.4 ± 46.3 per muscle sample,  
196 mean ± SD) myonuclei in the processed image scans.

197 In results compiled from both genders, we found type 1 fibers in significantly higher  
198 proportion in the psoas than in the corresponding pectoralis samples (Fig. 5A,  $p=0.0079$ ),  
199 corroborating the postural function of the psoas muscle in contrast to the more dynamic  
200 movement profile supported by the pectoralis muscle. The fiber type-specific difference  
201 between the two tissues, however, disappeared on the myonuclear level (Fig. 5B). This suggests  
202 that type 1 fibers on average contribute more to the myonuclear pool than type 2 fibers,  
203 explaining the discrepancy between fiber and myonuclear ratios in the psoas and pectoralis  
204 muscles.

205 FiNuTyper allows for the identification of grouped fibers, here defined as myofibers  
206 having three or more direct neighbors of the same type<sup>31</sup>. This value varied most in the  
207 functionally dominant psoas type 1 and pectoralis type 2 fibers, with the latter showing a  
208 significantly higher grouped fiber ratio compared to type 1 fibers in the same muscle (Fig. 5C,  
209  $p=0.0025$ ). Some of this difference, however, is due to the distinct fiber type composition of  
210 the two studied muscles<sup>32</sup>. Further mathematical analysis, aiming to minimize the intrinsic bias  
211 caused by the unequal abundance of the studied fiber subsets, can benefit from information on  
212 fiber type distribution, and other geometric parameters, such as cross-sectional area, readily  
213 available for every single fiber after the automated analysis.

214 The relationship between type 1 and type 2 fiber cross-sectional areas largely depends  
215 on the prevalent function of most muscles. Accordingly, in our pooled dataset type 1 fibers  
216 displayed a larger CSA than type 2 fibers in the psoas major, supporting its postural role (Fig.  
217 5D,  $p=0.0001$ ). In the pectoralis with a more dynamic function, we found no significant  
218 difference in size between the two fiber types, explained by the type 2 fibers being almost twice  
219 as large as their counterparts in the psoas (Fig. 5D,  $p=0.0184$ ). Males manifested strikingly  
220 larger CSA values in all four studied fiber subsets compared to females (Fig. 5D). The  
221 relationship between data points collected from the same individual was largely similar over  
222 the entire dataset and between genders, except for the CSA of pectoralis type 2 fibers, which

223 seemed to follow distinct trends in males and females. While in males these fibers were as large  
224 as pectoralis type 1 fibers (Fig. 5E) and almost twice as big as psoas type 2 fibers (Fig. 5D), in  
225 females they showed the opposite pattern, being significantly smaller than the type 1 fibers of  
226 the same muscle (Fig. 5F,  $p=0.0037$ ) and in the same size range as their counterparts in the  
227 psoas major (Fig. 5D).

228 We observed a similar trend to the CSA measurements in the myonuclei per fiber values  
229 between psoas type 1 and type 2 fibers (Fig. 5G). On the other hand, we found a pronouncedly  
230 higher myonuclear content in type 1 than in type 2 fibers of the pectoralis muscle (Fig. 5G,  
231  $p=0.0082$ ), in contrast to their similar CSA values. When analyzing the data points of the two  
232 genders separately, this difference disappeared in the male cohort (Fig. 5H), while the female  
233 pectoralis type 1 and type 2 fibers exhibited a similar relationship as in the pooled dataset (Fig.  
234 5I,  $p=0.0031$ ). These results corresponded well with the distinct pattern of CSA values seen in  
235 the male and female pectoralis muscles (Fig. 5E, F).

236 Based on the classical concept of the myonuclear domain (MND), the number of  
237 myonuclei assigned to single fibers should follow changes in the CSA, however, this  
238 assumption has been challenged in recent years<sup>26,33,34</sup>. We calculated the MND for all four fiber  
239 subsets in each subject (Fig. 5J). Pectoralis type 2 fibers on average showed higher MND  
240 compared to both psoas type 2 (Fig. 5J,  $p=0.0289$ ) and pectoralis type 1 fibers (Fig. 5J,  
241  $p=0.0161$ ). The latter difference, however, was not present separately in the male cohort (Fig.  
242 5K) and was driven by two female subjects (Fig. 5L,  $p=0.0244$ ), who also had the largest MND  
243 in psoas type 1 fibers in the female cohort (Fig. 5J).

244 All these results indicate gender-specific mechanisms and the relevance of individual-  
245 based factors in determining fiber type characteristics of different muscles (Fig. 5A-L). The  
246 mean values and standard deviation or all assessed parameters, calculated in the pooled cohort  
247 and male and female subjects separately, are displayed in Supplementary Table 2.

248

## 249 **Automated SERCA-based muscle analysis reveals pathological changes in ALS**

250 To test the applicability of the FiNuTyper pipeline to pathological muscle tissue, we analyzed  
251 a vastus lateralis muscle biopsy from a female patient with end-stage amyotrophic lateral  
252 sclerosis (ALS). First, we examined whether the association between corresponding SERCA  
253 and MyHC isoforms, observed in healthy tissue, remains intact in the diseased tissue. We  
254 compared MyHC1-MyHC2A-2X- and SERCA1-SERCA2-specific labeling in identical areas  
255 of consecutive tissue sections and found almost complete accordance between the signal  
256 patterns acquired from the two parallel stainings (Fig. 6A), suggesting that SERCA1 and  
257 SERCA2 detection allows for fiber-type discrimination even under pathological conditions.

258 The donor suffered from ALS with a bulbar onset for 8 years, and accordingly, we  
259 observed severe alterations of the muscle architecture with thickened connective tissue walls  
260 between muscle cells and pronounced atrophy and loss of type 2 myofibers (Fig. 6B). As  
261 expected, the most severely damaged type 2 fiber remnants were not identified as individual  
262 fiber objects by the pipeline, with the few annotated type 2 fibers retaining most resemblance  
263 to the normal fiber phenotype (Fig. 6B). We compiled data from three image scans (approx. 0.9  
264 x 0.9 mm<sup>2</sup>, 306 fibers and 567 myonuclei analyzed in total) of the diseased sample and  
265 compared the results to gender-specific reference values of fiber type composition and cross-  
266 sectional area, determined by a meta-analysis of 19 independent studies (Fig. 6C)<sup>35</sup>. The CSA  
267 of type 1 fibers in the ALS sample (4659 μm<sup>2</sup>) was above the published reference range (3829  
268 ± 180 μm<sup>2</sup>, mean ± SD) (Fig. 6C), indicating a hypertrophic response in this fiber population.  
269 At the same time, the extremely high ratio of type 1 fibers (99.36%), in comparison to the  
270 balanced distribution of fiber types according to the healthy reference value (48.1 ± 2.6, mean  
271 ± SD), supported our initial finding of substantial type 2 fiber loss in the diseased sample (Fig.  
272 6C). Muscle damage often initiates regenerative processes in the affected tissues with a  
273 common manifestation of increased frequency of centrally located myonuclei (Fig. 6D),  
274 signaling ongoing myonuclear accretion to the impaired fibers. We compared the number of

275 centrally located myonuclei per type 1 fiber in three technical replicate image scans of the ALS  
276 tissue to three healthy, female pectoralis samples in our postmortem dataset and found  
277 significantly higher values in the ALS tissue (Fig. 6D,  $p=0.0103$ ). All these observations are in  
278 line with our current understanding of ALS disease progression in human skeletal muscle and  
279 confirm that the FiNuTyper pipeline is adept at detecting pathology-related phenomena when  
280 analyzing diseased skeletal muscle tissue.

281

## 282 **Discussion**

283 Despite numerous technological advancements of late, immunohistochemical analysis of  
284 bioptic samples remains the methodological touchstone of skeletal muscle research.  
285 Acknowledging the importance of this approach, a substantial number of automated tools have  
286 been presented in recent years (Suppl. Table 1), aiming to increase the speed, accuracy, and  
287 extent of the microscopic image evaluation and avoid operator-induced bias, the most obvious  
288 limitations of the classical manual quantification. Each of these algorithms assesses biologically  
289 relevant myofiber characteristics, however, only a few of them perform simultaneous  
290 myonucleus assignment, relying exclusively on positional cues of nuclear objects in relation to  
291 the sarcolemma<sup>16,20</sup>. Challenges of unequivocal myonucleus identification have been pointed  
292 out as a major source of controversies around cellular processes involving myonuclear accretion  
293 or apoptosis<sup>5</sup>.

294 With FiNuTyper, we present the first automated image analysis pipeline utilizing  
295 myonuclear markers for skeletal muscle immunohistological evaluation. The only previously  
296 reported myonuclear marker, pericentriolar material 1 (PCM-1)<sup>25</sup>, which is a component of the  
297 perinuclear matrix in mature myonuclei, does not allow for direct fiber type assignment<sup>25</sup>. We  
298 used SERCA1- and SERCA2-specific immunostaining to obtain a distinct perinuclear signal  
299 on top of the extensive sarcoplasmic reticulum labelling in type 1 and type 2 myofibers,

300 respectively. This approach holds the additional advantage of allowing for simultaneous fiber-  
301 and myonucleotyping in the same muscle section.

302 We performed meticulous validation of the SERCA1- and SERCA2-specific antibodies  
303 used in our study. We found no specific SERCA2 labeling in an intensity range similar to that  
304 in muscle fibers in any other muscle-resident cell type, although the SERCA2b isoform has  
305 been reported to have a ubiquitous expression <sup>28</sup>.

306 We performed detailed characterization of MyHC and SERCA isoform expression  
307 patterns in various healthy muscle samples and in a pathological tissue. We found a high degree  
308 of concordance between the two labeling strategies, even in older individuals, where it has been  
309 suggested that the coordination between SERCA and MyHC isoforms might break down <sup>32</sup>.  
310 Notably, in several samples, we detected a subpopulation of SERCA2-positive fibers with an  
311 intermediate level of SERCA1 expression (Suppl. Fig. 2A), potentially signaling a wider  
312 phenotypical range in the type 1 fiber population and necessitating stringent gating strategies  
313 (Suppl. Fig. 2B) when directly comparing the results of MyHC- and SERCA-based staining  
314 approaches.

315 FiNuTyper utilizes a combination of deep learning-based approaches for automated  
316 image analysis, allowing for fast, and highly accurate identification and characterization of fiber  
317 and myonuclear objects in human skeletal muscle tissue under various experimental conditions.  
318 Concerning accuracy performance, we found the quality of tissue and staining in the analyzed  
319 image play the largest roles. In our hands, the integrity and conciseness of the fiber border are  
320 the most significant contributors to this type of quality difference. Since the quality of tissue is  
321 difficult to control for, and there is some confusion regarding how to quantify methodological  
322 reliability within the field <sup>36</sup>, we refrain from directly comparing the accuracy of FiNuTyper to  
323 other published automated approaches. The accuracy of myonuclear identification by  
324 FiNuTyper, compared to manual evaluation, is still considered good to excellent according to  
325 convention <sup>37</sup>. This is also, however, the feature most affected by poor tissue quality,

326 underlining the technical difficulties in this type of analysis when solely relying on the  
327 localization of myonuclei inside of the sarcolemma border. A high level of object recognition  
328 fidelity is required for proper fiber shape retention in the small peripheral region where the  
329 myonuclei are located, and only a few pixels of error in the identified fiber area might give rise  
330 to a neighboring cell's nucleus appearing within the fiber border and thus being considered a  
331 myonucleus. Therefore, including SERCA1 and SERCA2 labeling as a second level of  
332 myonucleus identification improves the accuracy of this type of analysis.

333 We showcased the overall efficiency and robustness of FiNuTyper-based evaluation by  
334 analyzing postmortem muscle samples of five male and five female subjects from the same age  
335 group (44-55 years). We collected tissue from two different muscles of the deceased donors,  
336 the psoas major and the pectoralis major, that are either inaccessible or rarely sampled in studies  
337 using biopsies from living subjects. This allowed us to evaluate myocyte- and myonucleus-  
338 related parameters at the level of the individual, muscle source (psoas major and pectoralis  
339 major), and fiber type (type 1 or type 2).

340 Moreover, we performed automated analysis on a muscle biopsy of a patient suffering  
341 from severe amyotrophic lateral sclerosis. Our analysis demonstrated that FiNuTyper, beyond  
342 characteristics of healthy muscle tissue, also successfully identifies features associated with  
343 muscle pathology and regenerative processes, such as the loss of fast-twitch motor units and a  
344 high frequency of centrally located myonuclei<sup>38-41</sup>.

345 The versatility of FiNuTyper lies largely on the Cellprofiler environment<sup>42,43</sup>, which  
346 allows for various adaptations of the original pipeline to answer other relevant research  
347 questions in the skeletal muscle field. To demonstrate this, we supply five additional annotated  
348 pipelines that build on the same basic principles but produce different outputs or utilize different  
349 markers. These include identifying and quantifying the hybrid myofiber and myonuclear  
350 populations using the SERCA markers (Fig. 7A), capillarization on a fiber subtype basis using  
351 UEA I, satellite cells using PAX7, tissue-resident and infiltrating immune cells using CD45

352 (Fig. 7B), and fiber-typing based on conventional MyHC markers. Validating these pipelines  
353 is beyond the scope of this project, but we supply them, along with example images, as  
354 steppingstones for further research (Mendeley data DOI: 10.17632/dfw8r794ph.1).

355 To conclude, with FiNuTyper we present an automated method for the high-throughput  
356 evaluation of the most important aspects of skeletal muscle histology, including simultaneous  
357 myofiber and myonucleus type analysis. For this goal, we have introduced and validated  
358 SERCA1 and SERCA2 as a novel, type 2- and type 1- specific myofiber and myonuclear  
359 markers, respectively. We have shown that our pipeline delivers results in line with human  
360 manual evaluation, and is robust enough to discern gender-, muscle origin- and fiber type-  
361 specific differences even in a relatively small sample population. The platform can also be  
362 successfully applied to pathological muscle samples, and is highly customizable, which we  
363 demonstrate by providing five additional pipelines for the analysis of other resident cell types,  
364 capillaries, and hybrid myofibers. Together, FiNuTyper facilitates the rapid processing of large  
365 image sets and analysis of multiple muscle characteristics, while increasing robustness and  
366 reproducibility in image-based skeletal muscle research.



## 367 **Methods**

### 368 **Study subjects, tissue collection, and ethics**

369 Postmortem tissue samples of psoas major and pectoralis major muscles were collected at the  
370 Department of Oncology-Pathology of Karolinska Institutet, Sweden, from 21 overall healthy  
371 donors during routine autopsies, with the informed consent of relatives (ethical permit number:  
372 Dnr 02-418.) Tissue biopsy from the vastus lateralis muscle of an ALS patient was provided by  
373 Susanne Petri from Hannover Medical School, Germany (ethical permit number: 6269). Tissue  
374 sections of vastus lateralis muscle biopsies, collected from 3 healthy subjects were provided by  
375 Carl Johan Sundberg from Karolinska Institute, Sweden (ethical permit number: Dnr 2016/590-  
376 31). Gender, age, and sampled muscles of the study subjects are listed in Supplementary Table  
377 3, while a summary of figures and datasets in which images or data from particular study  
378 subjects were included is presented in Supplementary Table 4.

379

### 380 **Tissue handling and cryosectioning**

381 The postmortem muscle samples and the tissue from the ALS subject were cut into  
382 approximately 5x5x5 mm<sup>3</sup> segments and then placed in a cryomold filled with Tissue-Tek  
383 O.C.T Compound (Sakura), in an orientation allowing for transversal sectioning of the  
384 myofibers. The tissue blocks were flash frozen in an isopentane-dry ice slurry, while the fresh  
385 bioptic muscle samples were flash frozen in liquid nitrogen-cooled isopentane, and then stored  
386 at -80 °C until sectioning. 7 µm (fresh biopsies), 20 µm (ALS tissue) or 40 µm (postmortem  
387 tissue) thick sections were cut from the O.C.T-embedded samples in a cryostat with -20 °C  
388 chamber temperature and -16 °C blade temperature. The sections were transferred and mounted  
389 on glass slides using the CryoJane Tape Transfer system and were either processed immediately  
390 or stored at -80°C in a tightly closed container until later use.

391

### 392 **Immunohistochemistry**

393 The slides were quickly warmed up to room temperature and then fixated in 4% formaldehyde-  
394 PBS (phosphate-buffered saline) for 20 minutes, followed by washing steps in PBS (3x5  
395 minutes). 250  $\mu$ l blocking and permeabilization solution (0.1% Triton X-100 and 4% normal  
396 goat or donkey serum in PBS), containing different combinations of primary antibodies (anti-  
397 SERCA1 (mouse monoclonal IgG1, VE121G9 clone, MA3-912, Thermo Fischer Scientific, 2  
398  $\mu$ g/ml); anti-SERCA1 (rabbit polyclonal IgG, PA5-78835, Thermo Fischer Scientific, 2.5  
399  $\mu$ g/ml); anti-SERCA2 (rabbit monoclonal IgG, EPR9392 clone, ab150435, Abcam, 2  $\mu$ g/ml);  
400 anti-MyHC1 (mouse monoclonal IgG2b, BA-D5 clone, DSHB, 1.25  $\mu$ g/ml); anti-MyHC2A-  
401 2X (mouse monoclonal IgG1, SC-71 clone, DSHB, 2.5  $\mu$ g/ml); anti-lamin A/C (mouse  
402 monoclonal IgG2b, 636 clone, sc-7292, Santa Cruz Biotechnology, 1  $\mu$ g/ml); anti-lamin A/C  
403 (goat polyclonal IgG, N-18, sc-6215, 1  $\mu$ g/ml); anti-PAX7 (mouse monoclonal IgG1, DSHB,  
404 2.5  $\mu$ g/ml); anti-CD45 (mouse monoclonal IgG1, MEM-28 clone, ab8216, 2  $\mu$ g/ml) and anti-  
405 laminin (rabbit polyclonal, L9393, 1  $\mu$ g/ml) was applied on each section, and the slides were  
406 then incubated in a humidified chamber at room temperature overnight. The following day, the  
407 sections were washed in PBS at room temperature (3x10 minutes), then 250  $\mu$ l PBS with  
408 different combinations of fluorescently labeled goat (A21121, A21127, A21242, A21245 or  
409 A31556, Thermo Fischer Scientific, 4  $\mu$ g/ml) and donkey (711-166-152, 711-546-152, 715-  
410 166-150 or 715-546-151, Jackson ImmunoResearch, 1.5  $\mu$ g/ml) secondary antibodies, Alexa  
411 Fluor 488- or 647-conjugated wheat germ agglutinin (WGA) (W11261 or W32466, Thermo  
412 Fischer Scientific, 5  $\mu$ g/ml) and rhodamine-conjugated Ulex Europaeus Agglutinin I (UEA I)  
413 (RL-1062, Vector Laboratories, 10  $\mu$ g/ml) was applied on the slides. The sections were  
414 incubated in a dark humidified chamber for 1 h at room temperature, with subsequent washing  
415 steps in PBS (3 times 10 minutes). The slides were submersed in PBS containing 0.2  $\mu$ g/ml 4,6-  
416 diamidino-2-phenylindole (DAPI, Thermo Fisher Scientific) for 5 minutes between the second  
417 and third washing steps. Finally, glass coverslips were mounted on the sections using ProLong

418 Gold Antifade Reagent (P10144, Thermo Fisher Scientific) and sealed with transparent nail  
419 polish after solidification. The stained slides were then stored at 4 °C in dark.

420

### 421 **Confocal microscopy and image processing**

422 Areas of interest of transversally cut muscle regions were selected based on the perceived  
423 roundness of myofibers, minimal shift in the fiber border signal between different imaging  
424 planes, and a SERCA-labelling pattern consistent with perpendicular fiber orientation.  
425 Representative images of the stained skeletal muscle sections were captured by a Carl Zeiss  
426 LSM 700 laser scanning microscope with a Zen 2012 Black Edition software, using a Carl Zeiss  
427 Plan-Apochromat 20x/0.8, 40x/1.3 Oil DIC (UV)VIS-IR and 63x/1.4 Oil DIC objectives, with  
428 a 1024x1024 pixel resolution and 4.1 µm, 1.9 µm and 1.1 µm optical thickness, respectively.  
429 For the manual and automated image analysis, 3x3 tile scans were captured with 20x  
430 magnification (0.156 µm/pixel), 5 µm optical thickness and 2048x2048 pixel resolution, and  
431 stitched with 10% overlap. For the determination of parameters including nuclear objects, the  
432 stitched scans were split into 9 image frames and processed sequentially, due to memory-related  
433 technical constraints. For scan-based analysis, the resolution of the tile scans was instead  
434 decreased to a quarter of the original (0.624 µm/pixel) using bicubic interpolation, which saved  
435 processing time but had a negligible effect on the accuracy of purely myofiber-related  
436 parameters.

437 Linear adjustments to the brightness and contrast of representative images were  
438 performed in Zen 2012 Black Edition and Affinity Designer. For images submitted to manual  
439 and automated analysis, care was taken not to oversaturate channels with information-bearing  
440 intensity values, as those were used to determine fiber- or myonucleus type. In the WGA or  
441 laminin channels, signal continuity and thus improved fiber object recognition was instead  
442 prioritized, and thus overexposure was allowed. All images were exported as both separate and  
443 merged channels in 8-bit png file format and submitted to manual or automated image analysis.

444

## 445 **Image analysis and data generation**

446 The FiNuTyper workflow combines two open-source software with an in-house-developed  
447 Cellprofiler<sup>42</sup> pipeline. Firstly, nuclear object recognition from the DAPI signal was performed  
448 using the image style transfer-based neural network NucleAIzer<sup>30</sup>, on image frames where  
449 average nuclear diameter was set to 30 pixels (0.156  $\mu\text{m}/\text{pixel}$ ). Then, fiber objects were  
450 identified from the myofiber border marker WGA or laminin signal by Cellpose<sup>29</sup>, on both  
451 image frames and stitched scans, with an object diameter of 300 pixels (0.156  $\mu\text{m}/\text{pixel}$ , frame-  
452 based analysis) or 75 pixels (0.624  $\mu\text{m}/\text{pixel}$ , scan-based analysis), with a cytoplasm model and  
453 the model's predefined thresholds. The generated nucleus- and fiber object-masked images,  
454 along with a merged and separate channel images for SERCA1, SERCA2, WGA and DAPI,  
455 were used as input in the Cellprofiler<sup>42</sup> pipeline for the frame-based analysis. No nuclear  
456 identification was performed as part of the scan-based analysis and thus no nucleus object-  
457 masked image was used in it. All parameters involving myonuclear values (type 1 myonuclear  
458 ratio, myonuclei per fiber, central myonuclei per fiber, myonuclear domain) were calculated  
459 from the high-resolution images with 0.156  $\mu\text{m}/\text{pixel}$  scaling, while purely fiber-related  
460 parameters (type 1 fiber ratio, cross-sectional area, grouped fiber ratio) were generated from  
461 the whole scans with decreased resolution with 0.624  $\mu\text{m}/\text{pixel}$  scaling, allowing for the analysis  
462 of a higher number of fibers in the same area of interest.

463 For fiber and myonucleus type determination, the intensities of the SERCA1 and  
464 SERCA2 signals were measured within the fiber and nucleus objects and quantified as average  
465 pixel intensity values (mean fiber or nucleus intensity). Fibers located on or close to the image  
466 borders were not identified by the pipeline, and fiber objects without measurable SERCA1 or  
467 SERCA2 signal were categorized as artefacts and excluded from subsequent analysis. After  
468 observing numerous (mainly type 2) fibers of uncommon shapes in our sections, we opted to  
469 completely exclude a roundness filter, commonly used in other automated pipelines, to avoid

470 introducing type-specific technical bias in our data collection. The SERCA1 and SERCA2  
471 intensity levels, used for fiber- and nucleotype gating, were calibrated for every experimental  
472 setting, using the histogram and density plot features of Cellprofiler Analyst<sup>43</sup>. For myonucleus  
473 type analysis, adjacency (adjacent object pixels or overlap) to a fiber object of the similar type  
474 was also considered. Based on the more distinct profile of SERCA2-positive fibers and  
475 myonuclei, fiber and nuclear objects co-expressing SERCA1 and SERCA2 were annotated as  
476 type 1.

477 Data used for subsequent analysis were extracted from the raw data file generated by  
478 the Cellprofiler<sup>42</sup> pipeline and compiled per individual or per image scan (technical replicates).  
479 Individual numbers assigned to myofiber objects in the output dataset allowed for their  
480 unequivocal identification in the original images, making post-hoc manual correction possible.  
481 Primary derived values (number of fibers and myonuclei, fiber size, number of central  
482 myonuclei and number of grouped fibers) were compiled and averaged in a type-specific  
483 manner and were used to calculate secondary derived values (type 1 fiber percentage, type 1  
484 myonucleus percentage, myonucleus per fiber, myonuclear domain, grouped fiber percentage  
485 and grouped fiber size compared to average fiber size). These values were then used to  
486 characterize distinct fiber populations of the study subjects.

487 In the five additional, annotated pipelines, the following minor modifications were  
488 made: fiber type annotation was performed exclusively based on the presence or absence of  
489 SERCA2 signal and the SERCA1 channel was replaced by UEA I (capillary identification),  
490 CD45 (leukocyte identification) or PAX7 (satellite cell identification). For capillary  
491 identification, nuclear objects were not considered, but UEA I-positive objects were annotated  
492 as capillaries using NucleAIzer (average object diameter set to 30 pixels). For leukocyte and  
493 satellite cell annotation, an overlap between DAPI and CD45 or Pax7 signals were considered.  
494 For a classical fiber typing pipeline, the SERCA1 channel was exchanged to MyHC2A-2X and  
495 the SERCA2 to MyHC1 and the WGA to laminin. Finally, for the quantification of hybrid fibers

496 and myonuclei, parallel gating strategy for SERCA1 and SERCA2 and identification of double  
497 positive objects was implemented.

498 The in-house-developed Cellprofiler module of the FiNuTyper pipeline is provided in  
499 Supplementary File 1 (scan-based analysis) and Supplementary File 2 (frame-based analysis),  
500 while technical notes and detailed instructions on how to run FiNuTyper is presented in  
501 Supplementary File 3 (Mendeley data DOI: 10.17632/dfw8r794ph.1).

502

### 503 **Validation of MyHC and SERCA isoform co-expression**

504 Overlap between the different MyHC and SERCA isoforms was evaluated in three male  
505 subjects of 25, 45, and 73 years of age, in immunostainings combining MyHC1-, MyHC2A-  
506 2X- and SERCA1- or SERCA2-specific antibodies with fluorescently conjugated WGA. Three,  
507 approx. 0.9 mm x 0.9 mm<sup>2</sup> image scans (3x3 image frames with 10% overlap) were captured  
508 from each individual and were submitted to automated image analysis. Per scan,  $213.78 \pm 25.47$   
509 fibers for SERCA1 and  $234.78 \pm 20.41$  fibers for SERCA2 validation were identified (mean  $\pm$   
510 SD). Mean fiber intensities were measured in all three relevant channels. After manual  
511 exclusion of incorrectly outlined fiber objects, mean fiber intensity in the SERCA channel,  
512 measured in individual fiber objects, was plotted against the mean fiber intensity in the  
513 corresponding MyHC channel (SERCA1–MyHC2A-2X; SERCA2–MyHC1). Quadrant gates  
514 were defined by the lowermost intensity values in the clearly double-positive population,  
515 outlining true positive (TP; SERCA<sup>+</sup>-MyHC<sup>+</sup>), true negative (TN; SERCA<sup>-</sup>-MyHC<sup>-</sup>), false  
516 positive (SERCA<sup>+</sup>-MyHC<sup>-</sup>) and false negative (SERCA<sup>-</sup>-MyHC<sup>+</sup>) fiber populations in each  
517 analyzed image scan. Sensitivity (TP/(TP+FN)), specificity (TN/(TN+FP)), positive predictive  
518 value (TP/(TP+FP)) and negative predictive value (TN/(TN+FN)) were calculated for each  
519 scan, and then used to generate mean values for each subject separately. Final accuracy values  
520 were calculated as an average for the three subjects, displayed as mean  $\pm$  SD.

521

## 522 **Validation of fiber and myonucleus identification and CSA measurements**

523 Fiber and myonucleus identification in postmortem psoas major and pectoralis major sections  
524 was evaluated by 2 independent operators, blind to the generated count, age, and gender of the  
525 subjects, in a 1/3 overlapping fashion (n=57 randomly selected, approx. 0.3 x 0.3 mm<sup>2</sup> image  
526 frames from ten subjects containing 880 fibers and 1179 myonuclei in total). Operator 1  
527 validated 25 such frames, operator 2 validated 23 such frames, and 9 such frames were validated  
528 by both operators, the results of which were averaged for subsequent evaluation. Similar  
529 analysis of frozen sections of fresh vastus lateralis muscle biopsies (n=9 randomly selected  
530 approx. 0.3 x 0.3 mm<sup>2</sup> image frames from three subjects containing 102 fibers and 304  
531 myonuclei in total) was performed by a single operator. Validation of cross-sectional area  
532 measurements was performed separately in type 1 and type 2 fibers by a single, similarly  
533 blinded operator, both in postmortem (n=35 randomly selected, approx. 0.3 x 0.3 mm<sup>2</sup> image  
534 frames from ten subjects containing 554 fibers in total) and fresh bioptic samples (n=9 randomly  
535 selected, approx. 0.3 x 0.3 mm<sup>2</sup> image frames from three subjects containing 102 fibers in total),  
536 where mean CSA per image frame values were calculated and displayed. The level of  
537 agreement between the manual and automated analyses was determined by calculating  
538 intraclass correlation coefficient (ICC) with 95% confidence interval, and Bland-Altman  
539 analysis. Automated cross-sectional area measurement was also validated against manual  
540 quantification on the individual fiber level in a single image scan (9 stitched image frames,  
541 approx. 0.9 x 0.9 mm<sup>2</sup>, n=243 fibers identified automatically; n=254 fibers evaluated manually).

542

## 543 **Statistics and data presentation**

544 Intraclass correlation coefficient (ICC) analysis (two-way random effects, absolute agreement,  
545 single measures) was performed in IBM SPSS statistics 27 to assess comparability between  
546 FiNuTyper-based and manual evaluation. Bland-Altman analysis for the validation dataset,  
547 paired data and group comparisons and visualization were performed in GraphPad Prism 9.3.1.

548 Normal distribution of grouped datasets was analyzed by Shapiro-Wilk and Kolmogorov-  
549 Smirnov tests. Differences between groups were analyzed either with one-way ANOVA and  
550 Tukey's post-hoc test, or in case of two groups, paired t-tests, Wilcoxon matched-pairs signed  
551 rank test, or Mann Whitney U test, depending on analyzing paired or unpaired data points and  
552 the result of the previous normality test. Statistical significance was set to  $p < 0.05$  and marked  
553 with asterisk (\*:  $p < 0.05$ ; \*\*:  $p \leq 0.01$ ; \*\*\*:  $p \leq 0.001$ ; \*\*\*\*:  $p \leq 0.0001$ ). For the validation  
554 analysis, per-image values were calculated and compared in all assessed parameters. For the  
555 analysis of the healthy subject cohort, generated values were pooled on a per-subject basis.  
556 Central myonuclei per fiber values were compared on a scan-basis between 3 healthy and one  
557 pathological muscle samples. Z-score was calculated from the  $Z = (x - \mu) / \sigma$  formula. All data are  
558 presented as mean  $\pm$  SD.

559

#### 560 **Data and code availability**

561 Data and code used in this study are available on Mendeley data (DOI: 10.17632/dfw8r794ph.1)  
562 and will be made public upon publication.

563

#### 564 **Author contributions**

565 A.L. designed the study, devised FiNuTyper, performed and evaluated experiments, analyzed  
566 data, prepared figures, and wrote the manuscript. E.L. designed the study, performed and  
567 evaluated experiments, analyzed data, prepared figures, wrote and revised the manuscript, and  
568 supervised the project. N.S.H. performed and evaluated experiments. E.B.E., S.M.R., M.A.C.,  
569 K.A., H.D., S.P., and C.J.S. collected tissue samples for the study. O.B. designed the study,  
570 wrote and revised the manuscript, supervised the project, and provided funding. All authors  
571 approved the final version of the manuscript.

572

#### 573 **Competing interests**



574 The authors declare no competing interests.

575

## 576 **Acknowledgements**

577 O.B. was supported by the Center for Regenerative Therapies Dresden, the Karolinska  
578 Institutet, the Swedish Research Council, the Ragnar Söderberg Foundation, the Åke Wiberg  
579 Foundation, and the LeDucq foundation. S.M.R. was supported by a doctoral grant from  
580 Karolinska Institutet. C.J.S., E.B.E. and M.A.C. were supported by grants from the Swedish  
581 Research Council and the Swedish Research Council for Sport Science. We would like to thank  
582 Marion Baniol for her help with handling the postmortem muscle samples and discussions about  
583 the project, and Paula Heinke and Wouter Derks for their insightful comments on the  
584 manuscript.

585

## 586 **References**

587

- 588 1. D'Antona, G. (2003). The effect of ageing and immobilization on structure and  
589 function of human skeletal muscle fibres. *J Physiol* 552, 499–511.  
590 10.1113/jphysiol.2003.046276.
- 591 2. Lexell, J., Taylor, C.C., and Sjöström, M. (1988). What is the cause of the  
592 ageing atrophy? *J Neurol Sci* 84, 275–294. 10.1016/0022-510X(88)90132-3.
- 593 3. Gundersen, K., Bruusgaard, J.C., Egner, I.M., Eftestøl, E., and Bengtson, M.  
594 (2018). Muscle memory: virtues of your youth? *J Physiol* 596.  
595 10.1113/JP276354.
- 596 4. Bruusgaard, J.C., Johansen, I.B., Egner, I.M., Rana, Z.A., and Gundersen, K.  
597 (2010). Myonuclei acquired by overload exercise precede hypertrophy and are  
598 not lost on detraining. *Proceedings of the National Academy of Sciences* 107.  
599 10.1073/pnas.0913935107.
- 600 5. Snijders, T., Aussieker, T., Holwerda, A., Parise, G., Loon, L.J.C., and Verdijk,  
601 L.B. (2020). The concept of skeletal muscle memory: Evidence from animal and  
602 human studies. *Acta Physiologica* 229. 10.1111/apha.13465.
- 603 6. Nilwik, R., Snijders, T., Leenders, M., Groen, B.B.L., van Kranenburg, J.,  
604 Verdijk, L.B., and van Loon, L.J.C. (2013). The decline in skeletal muscle mass  
605 with aging is mainly attributed to a reduction in type II muscle fiber size. *Exp*  
606 *Gerontol* 48. 10.1016/j.exger.2013.02.012.
- 607 7. Damas, F., Libardi, C.A., Ugrinowitsch, C., Vechin, F.C., Lixandrão, M.E.,  
608 Snijders, T., Nederveen, J.P., Bacurau, A. v., Brum, P., Tricoli, V., et al. (2018).  
609 Early- and later-phases satellite cell responses and myonuclear content with  
610 resistance training in young men. *PLoS One* 13. 10.1371/journal.pone.0191039.
- 611 8. Allen, D.L., Yasui, W., Tanaka, T., Ohira, Y., Nagaoka, S., Sekiguchi, C.,  
612 Hinds, W.E., Roy, R.R., and Edgerton, V.R. (1996). Myonuclear number and

- 613 myosin heavy chain expression in rat soleus single muscle fibers after  
614 spaceflight. *J Appl Physiol* 81. 10.1152/jappl.1996.81.1.145.
- 615 9. Lavin, K.M., Sealfon, S.C., McDonald, M.-L.N., Roberts, B.M., Wilk, K., Nair,  
616 V.D., Ge, Y., Lakshman Kumar, P., Windham, S.T., and Bamman, M.M. (2020).  
617 Skeletal muscle transcriptional networks linked to type I myofiber grouping in  
618 Parkinson's disease. *J Appl Physiol* 128, 229–240.  
619 10.1152/japplphysiol.00702.2019.
- 620 10. Fischer, L.R., Culver, D.G., Tennant, P., Davis, A.A., Wang, M., Castellano-  
621 Sanchez, A., Khan, J., Polak, M.A., and Glass, J.D. (2004). Amyotrophic lateral  
622 sclerosis is a distal axonopathy: evidence in mice and man. *Exp Neurol* 185,  
623 232–240. 10.1016/j.expneurol.2003.10.004.
- 624 11. Mayeuf-Louchart, A., Hardy, D., Thorel, Q., Roux, P., Gueniot, L., Briand, D.,  
625 Mazeraud, A., Bouglé, A., Shorte, S.L., Staels, B., et al. (2018). MuscleJ: a high-  
626 content analysis method to study skeletal muscle with a new Fiji tool. *Skelet*  
627 *Muscle* 8. 10.1186/s13395-018-0171-0.
- 628 12. Al-Shammari, A.A., Kissane, R.W.P., Holbek, S., Mackey, A.L., Andersen,  
629 T.R., Gaffney, E.A., Kjaer, M., and Egginton, S. (2019). Integrated method for  
630 quantitative morphometry and oxygen transport modeling in striated muscle. *J*  
631 *Appl Physiol* 126. 10.1152/japplphysiol.00170.2018.
- 632 13. Babcock, L.W., Hanna, A.D., Agha, N.H., and Hamilton, S.L. (2020).  
633 MyoSight—semi-automated image analysis of skeletal muscle cross sections.  
634 *Skelet Muscle* 10. 10.1186/s13395-020-00250-5.
- 635 14. Waisman, A., Norris, A.M., Elías Costa, M., and Kopinke, D. (2021). Automatic  
636 and unbiased segmentation and quantification of myofibers in skeletal muscle.  
637 *Sci Rep* 11. 10.1038/s41598-021-91191-6.
- 638 15. Desgeorges, T., Liot, S., Lyon, S., Bouvière, J., Kemmel, A., Trignol, A.,  
639 Rousseau, D., Chapuis, B., Gondin, J., Mounier, R., et al. (2019). Open-CSAM,  
640 a new tool for semi-automated analysis of myofiber cross-sectional area in  
641 regenerating adult skeletal muscle. *Skelet Muscle* 9. 10.1186/s13395-018-0186-  
642 6.
- 643 16. Sanz, G., Martínez-Aranda, L.M., Tesch, P.A., Fernandez-Gonzalo, R., and  
644 Lundberg, T.R. (2019). Muscle2View, a CellProfiler pipeline for detection of the  
645 capillary-to-muscle fiber interface and high-content quantification of fiber type-  
646 specific histology. *J Appl Physiol* 127. 10.1152/japplphysiol.00257.2019.
- 647 17. Smith, L.R., and Barton, E.R. (2014). SMASH – semi-automatic muscle analysis  
648 using segmentation of histology: a MATLAB application. *Skelet Muscle* 4.  
649 10.1186/2044-5040-4-21.
- 650 18. Kastenschmidt, J.M., Ellefsen, K.L., Mannaa, A.H., Giebel, J.J., Yahia, R.,  
651 Ayer, R.E., Pham, P., Rios, R., Vetrone, S.A., Mozaffar, T., et al. (2019).  
652 QuantiMus: A Machine Learning-Based Approach for High Precision Analysis  
653 of Skeletal Muscle Morphology. *Front Physiol* 10. 10.3389/fphys.2019.01416.
- 654 19. Encarnacion-Rivera, L., Foltz, S., Hartzell, H.C., and Choo, H. (2020). Myosoft:  
655 An automated muscle histology analysis tool using machine learning algorithm  
656 utilizing FIJI/ImageJ software. *PLoS One* 15. 10.1371/journal.pone.0229041.
- 657 20. Wen, Y., Murach, K.A., Vechetti, I.J., Fry, C.S., Vickery, C., Peterson, C.A.,  
658 McCarthy, J.J., and Campbell, K.S. (2018). MyoVision: software for automated  
659 high-content analysis of skeletal muscle immunohistochemistry. *J Appl Physiol*  
660 124. 10.1152/japplphysiol.00762.2017.
- 661 21. Stevens, C.R., Berenson, J., Sledziona, M., Moore, T.P., Dong, L., and  
662 Cheetham, J. (2020). Approach for semi-automated measurement of fiber

- 663 diameter in murine and canine skeletal muscle. *PLoS One* 15.  
664 10.1371/journal.pone.0243163.
- 665 22. Viggars, M.R., Wen, Y., Peterson, C.A., and Jarvis, J.C. (2022). Automated  
666 cross-sectional analysis of trained, severely atrophied, and recovering rat skeletal  
667 muscles using MyoVision 2.0. *J Appl Physiol* 132, 593–610.  
668 10.1152/jappphysiol.00491.2021.
- 669 23. Kim, Y.-J., Brox, T., Feiden, W., and Weickert, J. (2007). Fully automated  
670 segmentation and morphometrical analysis of muscle fiber images. *Cytometry*  
671 *Part A* 71A, 8–15. 10.1002/cyto.a.20334.
- 672 24. Klemencic, A., Kovacic, S., and Pernus, F. (1998). Automated segmentation of  
673 muscle fiber images using active contour models. *Cytometry* 32, 317–326.  
674 10.1002/(sici)1097-0320(19980801)32:4<317::aid-cyto9>3.0.co;2-e.
- 675 25. Winje, I.M., Bengtsen, M., Eftestøl, E., Juvkam, I., Bruusgaard, J.C., and  
676 Gundersen, K. (2018). Specific labelling of myonuclei by an antibody against  
677 pericentriolar material 1 on skeletal muscle tissue sections. *Acta Physiologica*  
678 223, e13034. 10.1111/apha.13034.
- 679 26. Murach, K.A., Englund, D.A., Dupont-Versteegden, E.E., McCarthy, J.J., and  
680 Peterson, C.A. (2018). Myonuclear Domain Flexibility Challenges Rigid  
681 Assumptions on Satellite Cell Contribution to Skeletal Muscle Fiber  
682 Hypertrophy. *Front Physiol* 9. 10.3389/fphys.2018.00635.
- 683 27. Herman-Montemayor, J.R., Hikida, R.S., and Staron, R.S. (2015). Early-Phase  
684 Satellite Cell and Myonuclear Domain Adaptations to Slow-Speed vs.  
685 Traditional Resistance Training Programs. *J Strength Cond Res* 29.  
686 10.1519/JSC.0000000000000925.
- 687 28. Xu, H., and van Remmen, H. (2021). The SarcoEndoplasmic Reticulum Calcium  
688 ATPase (SERCA) pump: a potential target for intervention in aging and skeletal  
689 muscle pathologies. *Skelet Muscle* 11, 25. 10.1186/s13395-021-00280-7.
- 690 29. Stringer, C., Wang, T., Michaelos, M., and Pachitariu, M. (2021). Cellpose: a generalist  
691 algorithm for cellular segmentation. *Nat Methods* 18, 100–106. 10.1038/s41592-020-  
692 01018-x.
- 693 30. Hollandi, R., Szkalicity, A., Toth, T., Tasnadi, E., Molnar, C., Mathe, B., Grexa, I.,  
694 Molnar, J., Balind, A., Gorbe, M., et al. (2020). nucleAIzer: A Parameter-free Deep  
695 Learning Framework for Nucleus Segmentation Using Image Style Transfer. *Cell Syst*  
696 10. 10.1016/j.cels.2020.04.003.
- 697 31. Mosole, S., Carraro, U., Kern, H., Loeffler, S., and Zampieri, S. (2016). Use it or Lose  
698 It: Tonic Activity of Slow Motoneurons Promotes Their Survival and Preferentially  
699 Increases Slow Fiber-Type Groupings in Muscles of Old Lifelong Recreational  
700 Sportsmen. *Eur J Transl Myol* 26, 5972. 10.4081/ejtm.2016.5972.
- 701 32. Kelly, N.A., Hammond, K.G., Stec, M.J., Bickel, C.S., Windham, S.T., Tuggle, S.C.,  
702 and Bamman, M.M. (2018). Quantification and characterization of grouped type I  
703 myofibers in human aging. *Muscle Nerve* 57. 10.1002/mus.25711.
- 704 33. Conceição, M.S., Vechin, F.C., Lixandrão, M., Damas, F., Libardi, C.A., Tricoli, V.,  
705 Roschel, H., Camera, D., and Ugrinowitsch, C. (2018). Muscle Fiber Hypertrophy and  
706 Myonuclei Addition: A Systematic Review and Meta-analysis. *Med Sci Sports Exerc*  
707 50, 1385–1393. 10.1249/MSS.0000000000001593.
- 708 34. Snijders, T., Holwerda, A.M., van Loon, L.J.C., and Verdijk, L.B. (2021). Myonuclear  
709 content and domain size in small versus larger muscle fibres in response to 12 weeks of  
710 resistance exercise training in older adults. *Acta Physiol (Oxf)* 231, e13599.  
711 10.1111/apha.13599.

- 712 35. Gouzi, F., Maury, J., Molinari, N., Pomiès, P., Mercier, J., Préfaut, C., and Hayot, M.  
713 (2014). Reference values for vastus lateralis fiber type proportion and fiber size. *J Appl*  
714 *Physiol* *116*, 228–228. 10.1152/jappphysiol.01332.2013.
- 715 36. Ranganathan, P., Pramesh, C., and Aggarwal, R. (2017). Common pitfalls in statistical  
716 analysis: Measures of agreement. *Perspect Clin Res* *8*, 187.  
717 10.4103/picr.PICR\_123\_17.
- 718 37. Koo, T.K., and Li, M.Y. (2016). A Guideline of Selecting and Reporting Intraclass  
719 Correlation Coefficients for Reliability Research. *J Chiropr Med* *15*, 155–163.  
720 10.1016/j.jcm.2016.02.012.
- 721 38. Krivickas, L.S., Yang, J.-I., Kim, S.-K., and Frontera, W.R. (2002). Skeletal muscle  
722 fiber function and rate of disease progression in amyotrophic lateral sclerosis. *Muscle*  
723 *Nerve* *26*, 636–643. 10.1002/mus.10257.
- 724 39. Hegedus, J., Putman, C.T., and Gordon, T. (2007). Time course of preferential motor  
725 unit loss in the SOD1G93A mouse model of amyotrophic lateral sclerosis. *Neurobiol*  
726 *Dis* *28*, 154–164. 10.1016/j.nbd.2007.07.003.
- 727 40. Hegedus, J., Putman, C.T., Tyreman, N., and Gordon, T. (2008). Preferential motor  
728 unit loss in the SOD1G93A transgenic mouse model of amyotrophic lateral sclerosis. *J*  
729 *Physiol* *586*, 3337–3351. 10.1113/jphysiol.2007.149286.
- 730 41. Achari, A.N., and Anderson, M.S. (1974). Myopathic changes in amyotrophic lateral  
731 sclerosis. Pathologic analysis of muscle biopsy changes in 111 cases. *Neurology* *24*,  
732 477–481. 10.1212/wnl.24.5.477.
- 733 42. McQuin, C., Goodman, A., Chernyshev, V., Kametsky, L., Cimini, B.A., Karhohs,  
734 K.W., Doan, M., Ding, L., Rafelski, S.M., Thirstrup, D., et al. (2018). CellProfiler 3.0:  
735 Next-generation image processing for biology. *PLoS Biol* *16*.  
736 10.1371/journal.pbio.2005970.
- 737 43. Dao, D., Fraser, A.N., Hung, J., Ljosa, V., Singh, S., and Carpenter, A.E. (2016).  
738 CellProfiler Analyst: interactive data exploration, analysis and classification of  
739 large biological image sets. *Bioinformatics* *32*. 10.1093/bioinformatics/btw390.  
740  
741

742 **Figure legends**

743 **Figure 1. Outline of image processing workflow in FiNuTyper.** (A) Input image (left) and  
744 graphical output (right) of the analysis performed by FiNuTyper. The areas designated by red  
745 rectangles include (1) a SERCA1-positive, type 2 myonucleus (arrow), (2) a SERCA2-positive,  
746 type 1 myonucleus (arrowhead), (3) a double negative non-myonucleus (drop) beside a type 1  
747 myonucleus (arrowhead), and (4) an area between fiber borders, not containing any nuclei. The  
748 scale bar represents 5  $\mu\text{m}$ . (B) Overview of the image processing pipeline. Fiber objects,  
749 generated in Cellpose<sup>29</sup> from the WGA fiber border channel are first typed based on SERCA1  
750 and SERCA2 intensity. Nuclear objects, generated in NucleAIzer<sup>30</sup> from the DAPI nuclear  
751 channel are typed based on SERCA1 and SERCA2 intensity and corresponding fiber type  
752 adjacency. The typed objects are co-analyzed to produce measurements of myonucleus per  
753 fiber, myonuclear domain, central myonucleus per fiber, grouped fiber ratio, and cross-sectional  
754 area, separately for each fiber type.

755

756 **Figure 2. SERCA 1 and SERCA2 show distinct perinuclear localization in complementary**  
757 **myofiber populations.** (A) Multicolor immunostaining panel using SERCA1 (green) and  
758 SERCA2 (red) as myofiber markers, WGA (white) for fiber border, and DAPI (blue) for nuclear  
759 labeling, delineate partially overlapping myofiber populations in transversal sections of human  
760 skeletal muscle. The selected area contains a high number of fibers co-expressing both SERCA  
761 isoforms (asterisk). The scale bar represents 100  $\mu\text{m}$ . (B) SERCA1 and SERCA2 (red) are  
762 detected in a distinct perinuclear structure (besides the sarcoplasmic reticulum of the respective  
763 fiber type), consistent with the position of the nuclear envelope, showing close spatial  
764 association with the nuclear lamina marker lamin A/C. SERCA1-positive myonuclei are  
765 marked by arrows, and SERCA2-positive myonuclei are marked by arrowheads. The scale bar  
766 represents 20  $\mu\text{m}$ .

767

768 **Figure 3. SERCA- and MyHC-based fiber typing approaches provide consistent results**  
769 **in human skeletal muscle.** (A) Co-staining of transversal section of human skeletal muscle  
770 with antibodies against classical myosin heavy chain markers and the two SERCA isoforms  
771 confirm almost complete overlap between SERCA1 (upper panel, green) and MyHC2A-2X  
772 (blue), as well as SERCA2 (lower panel, green) with MyHC1 (red) labeling. The scale bar  
773 represents 200  $\mu\text{m}$ . (B) Mean signal intensity distribution of SERCA1 (green) and (C) SERCA2  
774 (green) align with type 2 and type 1 fiber identities, assigned based on MyHC2A-2X (blue) and  
775 MyHC1 (red) mean signal intensities measured in individual myofibers of the same area (single  
776 scans,  $n=236$  fibers). (D) The gating strategy to compare corresponding MyHC- and SERCA  
777 isoform-based fiber type assignment for type 2 and (E) type 1 myofibers uses stringent cutoffs,  
778 based on the signal intensities of the defined double positive populations. TP: true positives  
779 ( $\text{SERCA}^+\text{-MyHC}^+$ ); FP: false positives ( $\text{SERCA}^+\text{-MyHC}^-$ ); FN: false negatives: ( $\text{SERCA}^-$   
780  $\text{MyHC}^+$ ); true negatives:  $\text{SERCA}^-\text{-MyHC}^-$ ). (F) Sensitivity, specificity, positive and negative  
781 predictive values of SERCA1 as a type 2 (black columns) and SERCA2 as a type 1 (grey  
782 columns) myofiber marker (based on  $n=3$  subjects, 3 image scans/subject, mean  $\pm$  SD).

783

784 **Figure 4. Automated SERCA-based image analysis by FiNuTyper provides results**  
785 **comparable to manual evaluation of human skeletal muscle sections.** (A) Comparison of  
786 the number of fibers per image frame (ICC=0.985 (0.923-0.997),  $n=9$  for fresh biopsies (black);  
787 ICC=0.977 (0.962-0.987),  $n=57$  for postmortem tissue, (grey)); (B) number of myonuclei per  
788 image frame (ICC=0.912 (0.641-0.980),  $n=9$  for fresh biopsies (black); ICC=0.790 (0.268-  
789 0.918),  $n=57$  for postmortem tissue, (grey)); (C) type 1 fiber cross-sectional area per image  
790 frame (ICC=0.988 (0.947-0.998),  $n=9$  for fresh biopsies, (black); ICC=0.997 (0.990-0.999),  
791  $n=35$  for postmortem tissue, (grey)) and (D) type 2 fiber cross-sectional area per image frame  
792 (ICC=0.982 (0.855-0.997),  $n=9$  for fresh biopsies (black); ICC=0.985 (0.969-0.993),  $n=35$  for  
793 postmortem tissue (grey)), determined manually and generated by the automated approach.

794 Linear regression lines were forced to intersect  $x,y=0,0$ . The line of identity is displayed in red.  
795 The image frame size was approximately  $0.3 \times 0.3 \text{ mm}^2$ . ICC: intraclass correlation coefficient,  
796 single measure (95% confidence interval). (E) Fiber size distribution in a single image scan  
797 (approximately  $0.9 \times 0.9 \text{ }\mu\text{m}^2$ ) based on automated (n=243, dark grey) and manual (n=254, light  
798 grey) evaluation.

799

800 **Figure 5. FiNuTyper identifies gender-, muscle- and fiber type-specific characteristics in**  
801 **healthy human skeletal muscle.** Fiber- and myonuclear evaluation of healthy skeletal muscle  
802 tissue was performed by the FiNuTyper pipeline. Data was collected and pooled from 3, approx.  
803  $0.9 \times 0.9 \text{ }\mu\text{m}^2$  image scans of postmortem psoas major and pectoralis major samples of five  
804 males (blue data points) and five females (orange data points) between 44-55 years of age. Data  
805 points derived from the same subject are visualized with a connecting line. (A) Type 1 fiber  
806 and (B) myonucleus ratios of psoas and pectoralis muscle. (C) Grouped fiber ratios of type 1  
807 and type 2 fibers in the psoas and pectoralis muscle. (D) Cross-sectional area (CSA) of type 1  
808 and 2 fibers in the psoas and pectoralis muscle. (E) Analysis of paired male and (F) female CSA  
809 data points in pectoralis type 1 and type 2 fibers. (G) Myonucleus per fiber values of type 1 and  
810 2 fibers in the psoas and pectoralis muscle. (H) Analysis of paired male and (I) female data  
811 points in pectoralis type 1 and type 2 fibers. (J) Myonuclear domain size (MND) of type 1 and  
812 2 fibers in the psoas and pectoralis muscle. (K) Analysis of paired male and (L) female data  
813 points in pectoralis type 1 and type 2 fibers. Statistical analysis was performed between all  
814 compared datasets, with one-way ANOVA and Tukey post hoc test (C, D, G, J), paired t-tests  
815 (A, B, E, F, I, K, L), or Wilcoxon matched-pairs signed rank test (H), depending on the results  
816 of previous normality test. Statistical significance was set to  $p < 0.05$  and marked with asterisk  
817 (\*:  $p < 0.05$ ; \*\*:  $p \leq 0.01$ ; \*\*\*:  $p \leq 0.001$ ; \*\*\*\*:  $p \leq 0.0001$ ; lack of statistical difference was  
818 not marked on the plots). Data are presented as mean  $\pm$  SD.

819

820 **Figure 6. FiNuTyper detects type 2 fiber loss and abundance of central myonuclei in ALS-**  
821 **affected muscle.**

822 (A) SERCA1 (green) - SERCA2 (red) (left panel) and MyHC2A-2X (green) - MyHC1 (red)  
823 (right panel) labeling provides highly similar staining patterns in consecutive sections of  
824 skeletal muscle tissue of an ALS patient. Type 2 fibers identified by SERCA1 or MyHC2A-2X  
825 expression are marked by arrows. The scale bar represents 100  $\mu\text{m}$ . (B) Segmentation of type  
826 1 (grey) and type 2 (red) fibers (right panel) based on SERCA2 (white) and SERCA1 (red)  
827 immunostaining signal (left panel) in vastus lateralis muscle of an ALS patient. (C) Mean type  
828 1 fiber CSA ( $\mu\text{m}^2$ ) and type 1 fiber ratio (%) of the ALS muscle sample, calculated from pooled  
829 data of three, approx.  $0.9 \times 0.9 \mu\text{m}^2$  image scans (n=304 type 1 and n=1 type 2 fibers identified).  
830 Comparison to reference values for type 1 fibers of healthy female vastus lateralis tissue <sup>35</sup>  
831 yields a Z-score of 4,611 for CSA and 19.712 for type 1 fiber ratio, assuming normal  
832 distribution of the reference data. (D) Centrally located myonuclei (arrowheads) in type 1 fibers  
833 are more frequent in the pathological vastus lateralis sample (black data points) than in the  
834 pectoralis major of three healthy female subjects of the same age group (data points in different  
835 shades of grey). Three image scans per subject were analyzed and treated as technical replicates.  
836 The scale bar represents 40  $\mu\text{m}$ .

837

838 **Figure 7. Versatility of FiNuTyper in other experimental settings.**

839 (A) Quantification of hybrid myofibers (asterisk) is based on the co-expression of the two  
840 SERCA isoforms, which also allows for the identification of hybrid myonuclei with  
841 overlapping perinuclear SERCA1 (arrow) and SERCA2 (arrowhead) signals. (B) Schematic  
842 overview of modified FiNuTyper applications includes capillary identification based on UEA  
843 I labeling, satellite cell identification based on nuclear PAX7 expression, and immune cell  
844 identification based on the presence of the CD45 marker.

845



846 **Supplementary figure 1. Perinuclear SERCA1 and SERCA2 labeling is specific for**  
847 **myonuclei.** (A) SERCA1 (arrows) and SERCA2 (arrowheads) show a distinct labelling pattern  
848 around nuclei inside of skeletal muscle fibers, but not around non-myonuclei (drop). The scale  
849 bar represents 20  $\mu\text{m}$ . (B) No SERCA1- or SERCA2- specific staining can be observed in vessel  
850 walls or larger connective tissue segments labeled by WGA, in skeletal muscle sections. The  
851 scale bar represents 100  $\mu\text{m}$ . (C) Satellite cells, identified by nuclear PAX7 labeling, do not  
852 display SERCA1- or SERCA2-specific nuclear or perinuclear signals. The scale bar represents  
853 10  $\mu\text{m}$ .

854

855 **Supplementary figure 2. A subpopulation of type 1 fibers expresses intermediate levels of**  
856 **SERCA1.** (A) Combined SERCA1-SERCA2 immunostaining detects a subpopulation of  
857 SERCA2-positive fibers with weak SERCA1 signal (asterisk) in a muscle sample with no  
858 hybrid fibers co-labelled by MyHC1 and MyHC2A-2X. The scale bar represents 200  $\mu\text{m}$ . (B)  
859 Automated measurements of mean fiber intensities in the MyHC1, MyHC2A-2X, SERCA1,  
860 and SERCA2 channels identify a small group of type 1 fibers with intermediate SERCA1  
861 expression (orange data points), present both in subject #1 with virtually no, and subject #2  
862 with a higher ratio of real hybrid fibers (yellow data points), defined by co-expression of  
863 MyHC1 and MyHC2A-2X. By using stringent dual thresholds for SERCA 1 and SERCA2  
864 intensities, hybrid fibers appear in similar proportions to those in MyHC-stained samples from  
865 the same individual. N=234 (upper left panel), n=241 (upper right panel), n=269 (lower left  
866 panel), and n=224 (lower right panel) fibers analyzed and displayed.

867

868 **Supplementary figure 3. Bland-Altman analysis of validation dataset.** Difference between  
869 manual and FiNuTyper-based analysis of randomly selected image frames, displayed as ratio  
870 (manual/automated) vs. average, with 95% limits of agreement (dotted lines). Agreement  
871 between the two approaches in the (A) number of identified fibers, (B) myonuclei, (C) and

872 cross-sectional area of type 1 and (D) type 2 fibers was assessed separately in fresh biopsies  
873 (left panels) and postmortem muscle (right panels). A detailed evaluation of the validation  
874 dataset is presented in Figure 4.

875

876 **Supplementary Table 1. Overview of features in selected automated muscle analysis**  
877 **approaches.** <sup>11,13,14,16,19,22–24</sup>

878 **Supplementary Table 2. Mean values and standard deviation of fiber- and myonucleus-**  
879 **related parameters in the healthy subject cohort, determined by FiNuTyper.**

880 **Supplementary Table 3. Information on subjects included in this study.**

881 **Supplementary Table 4. List of subjects used for different figures and datasets.**

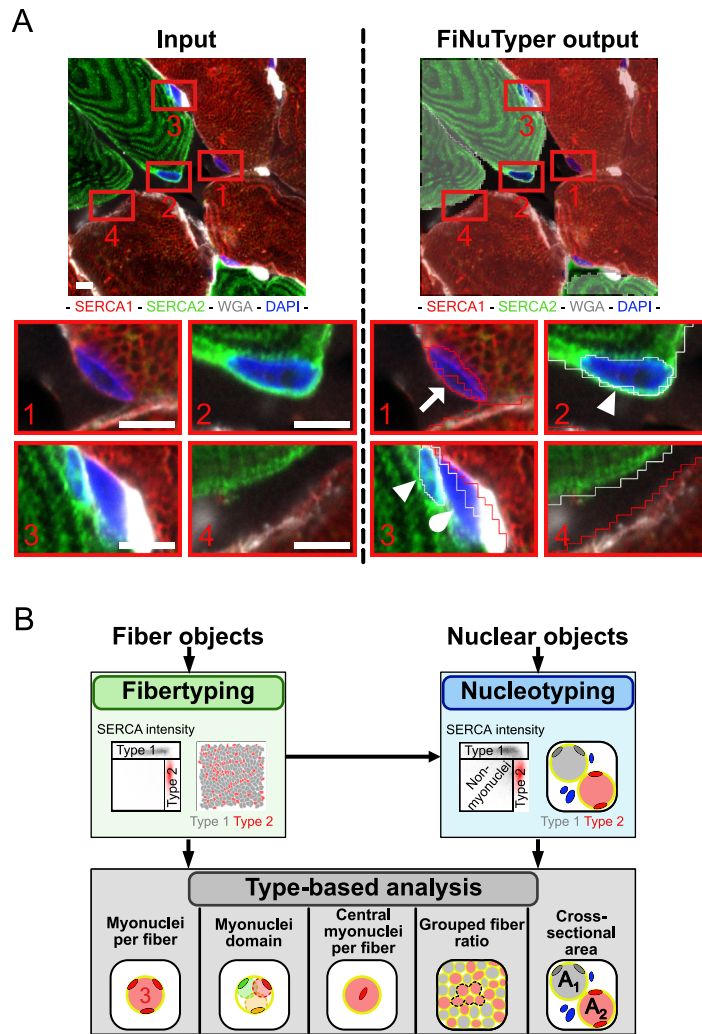

**Figure 1**

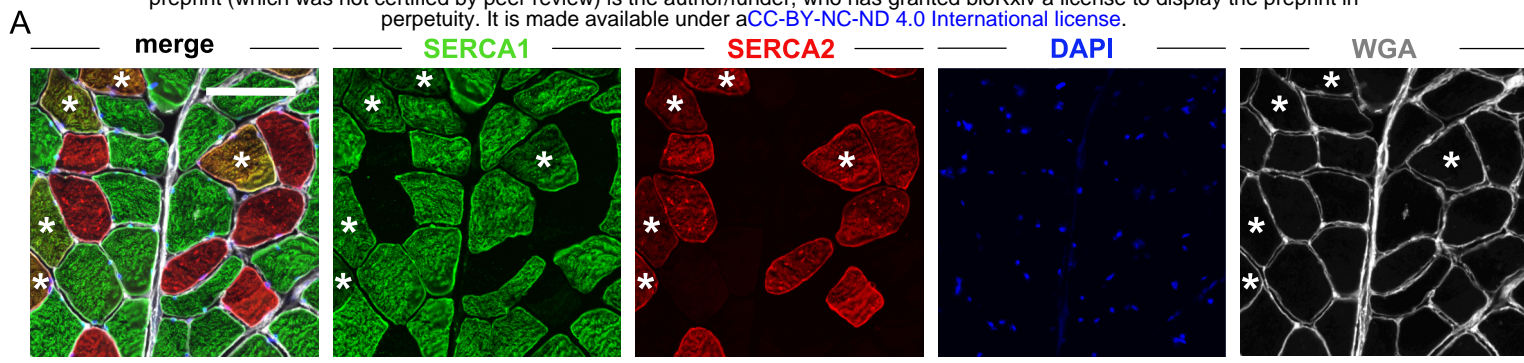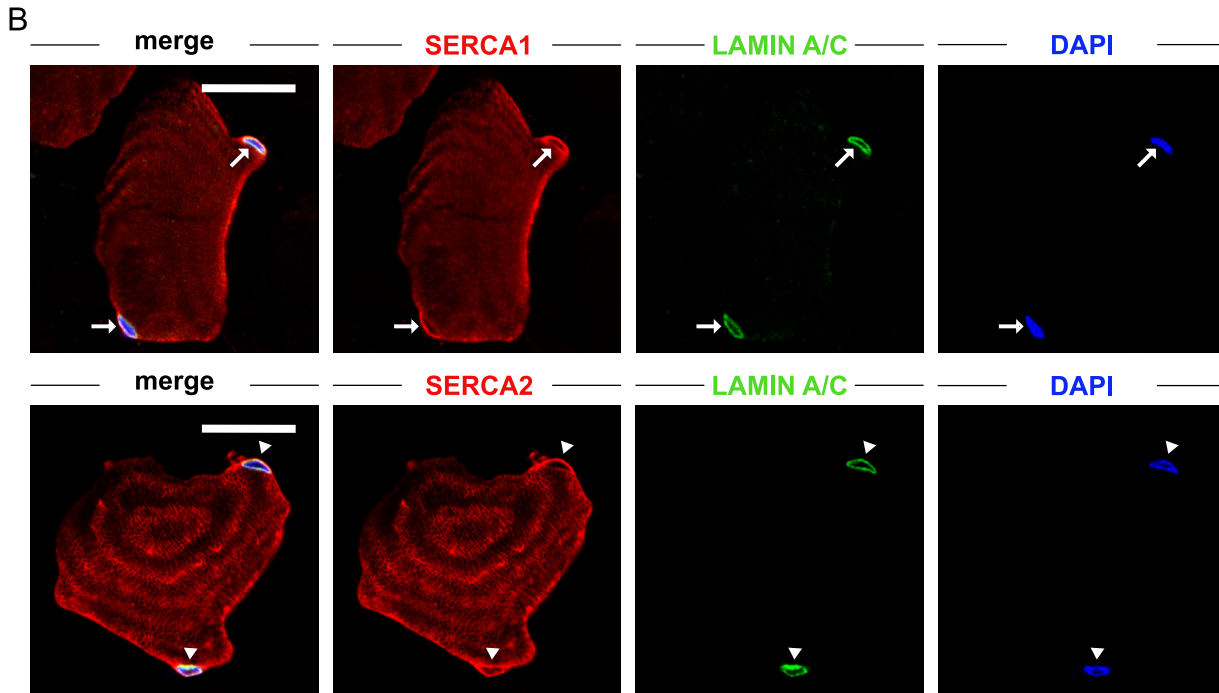

**Figure 2**

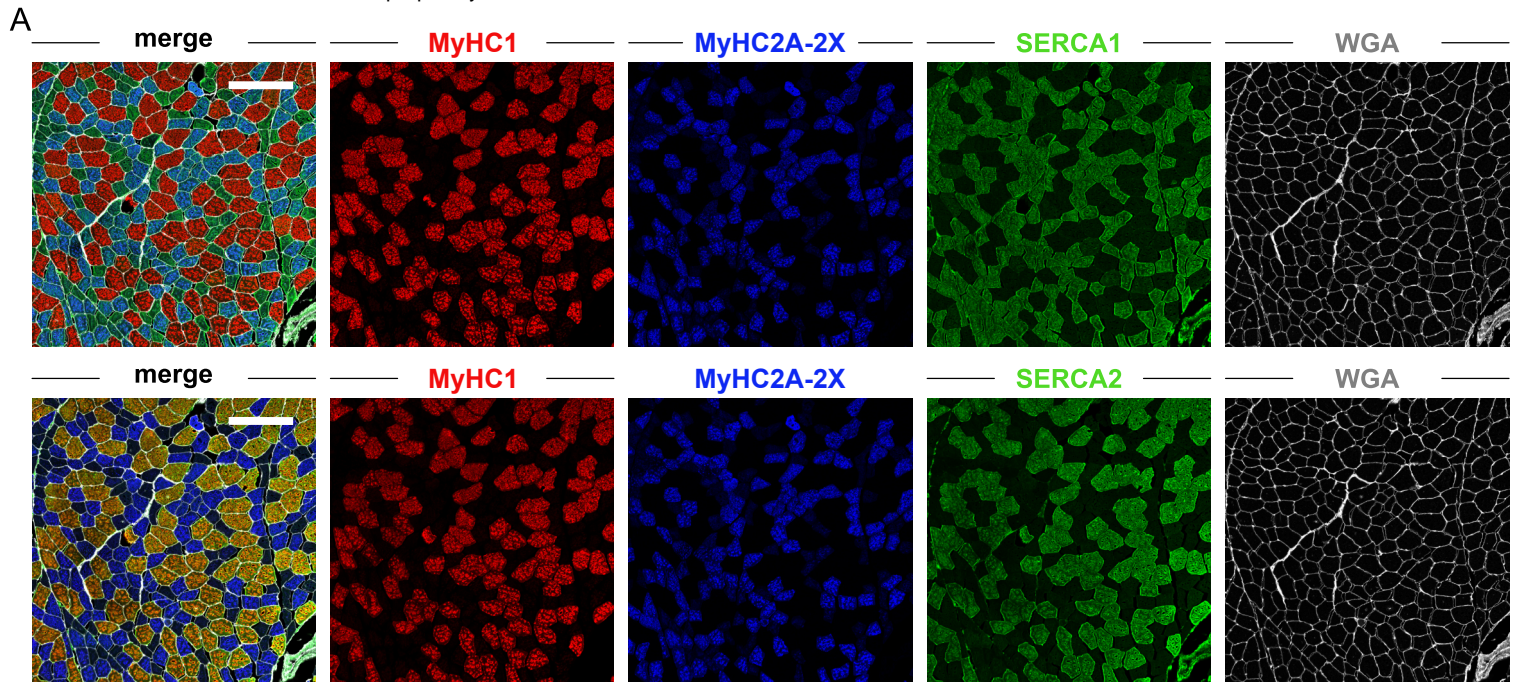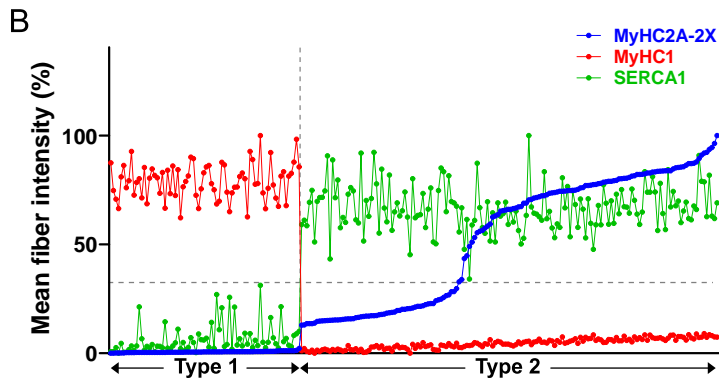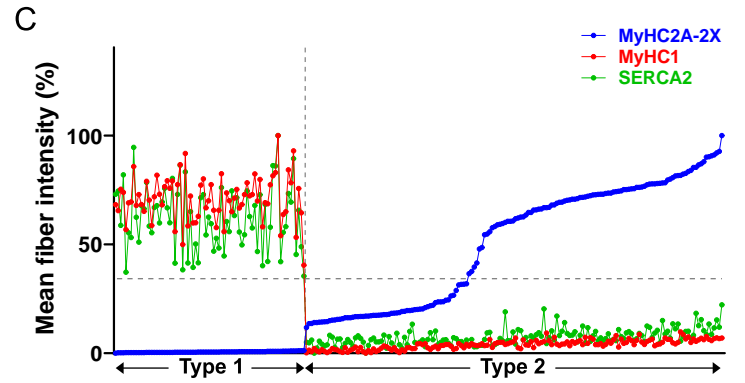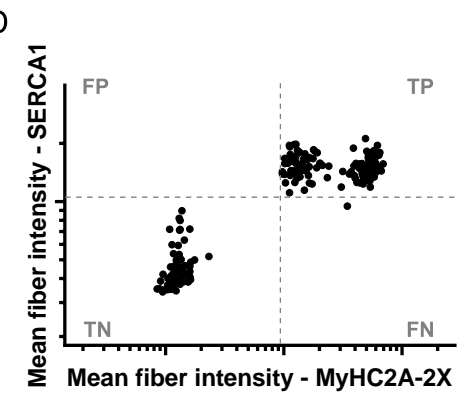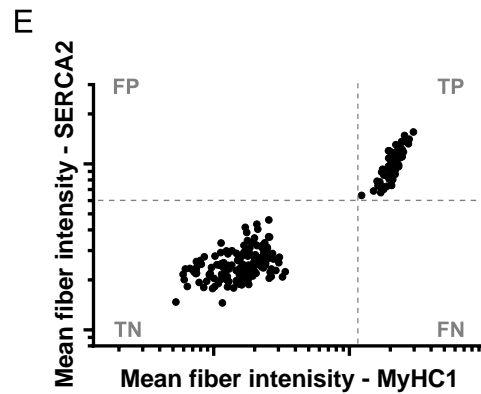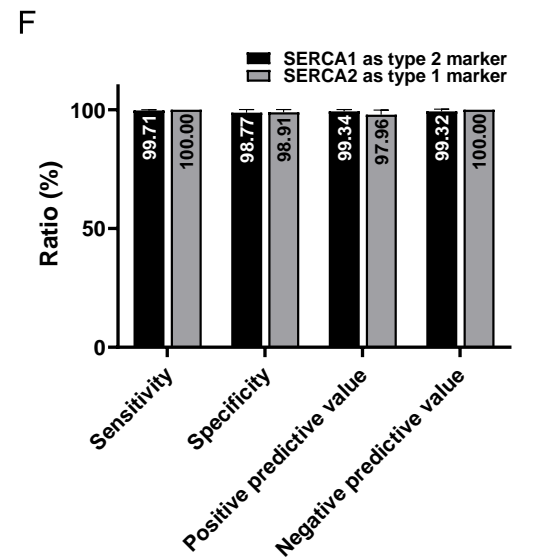

**Figure 3**

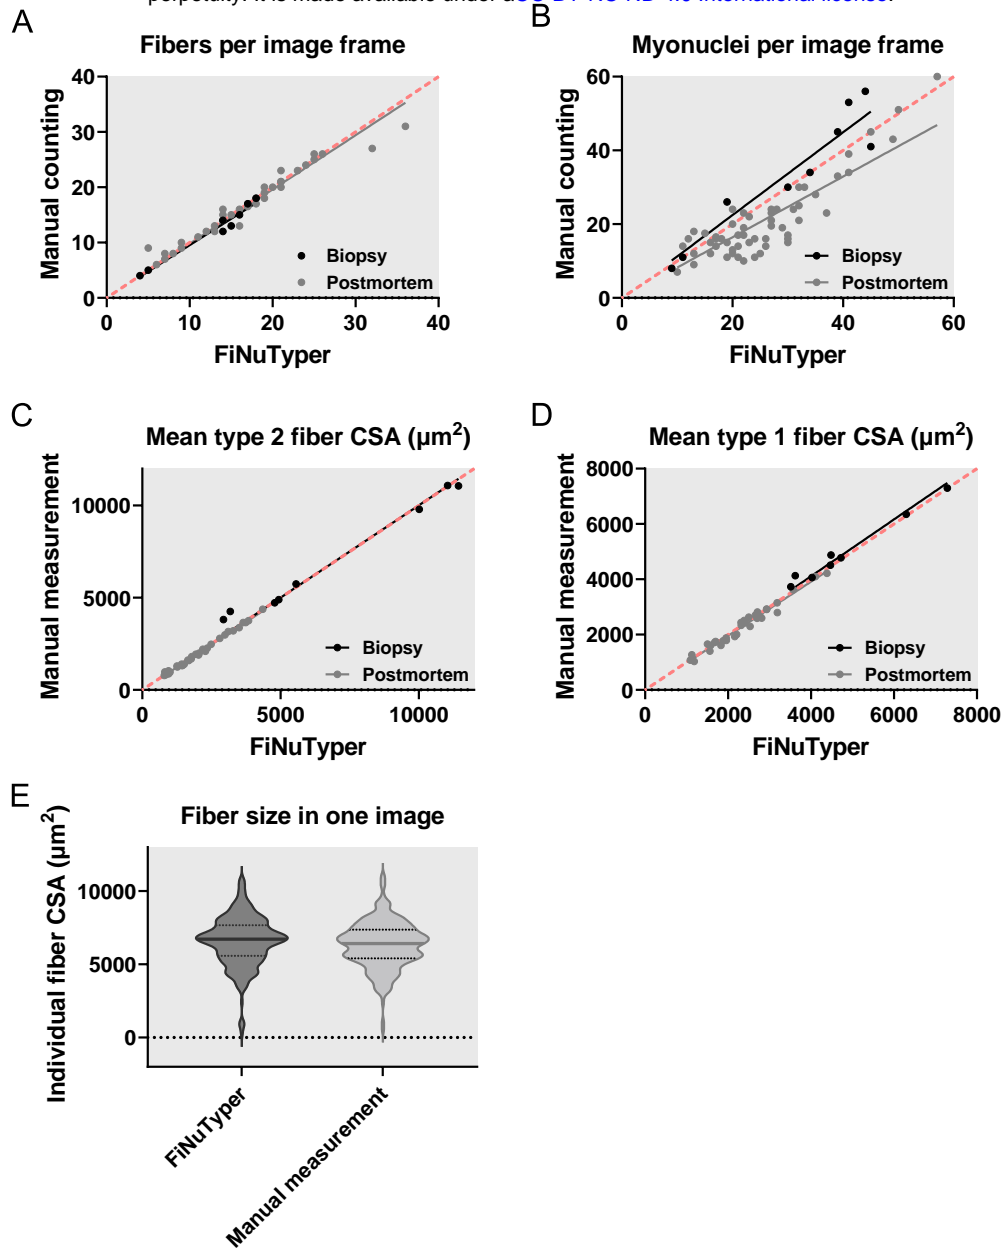

Figure 4

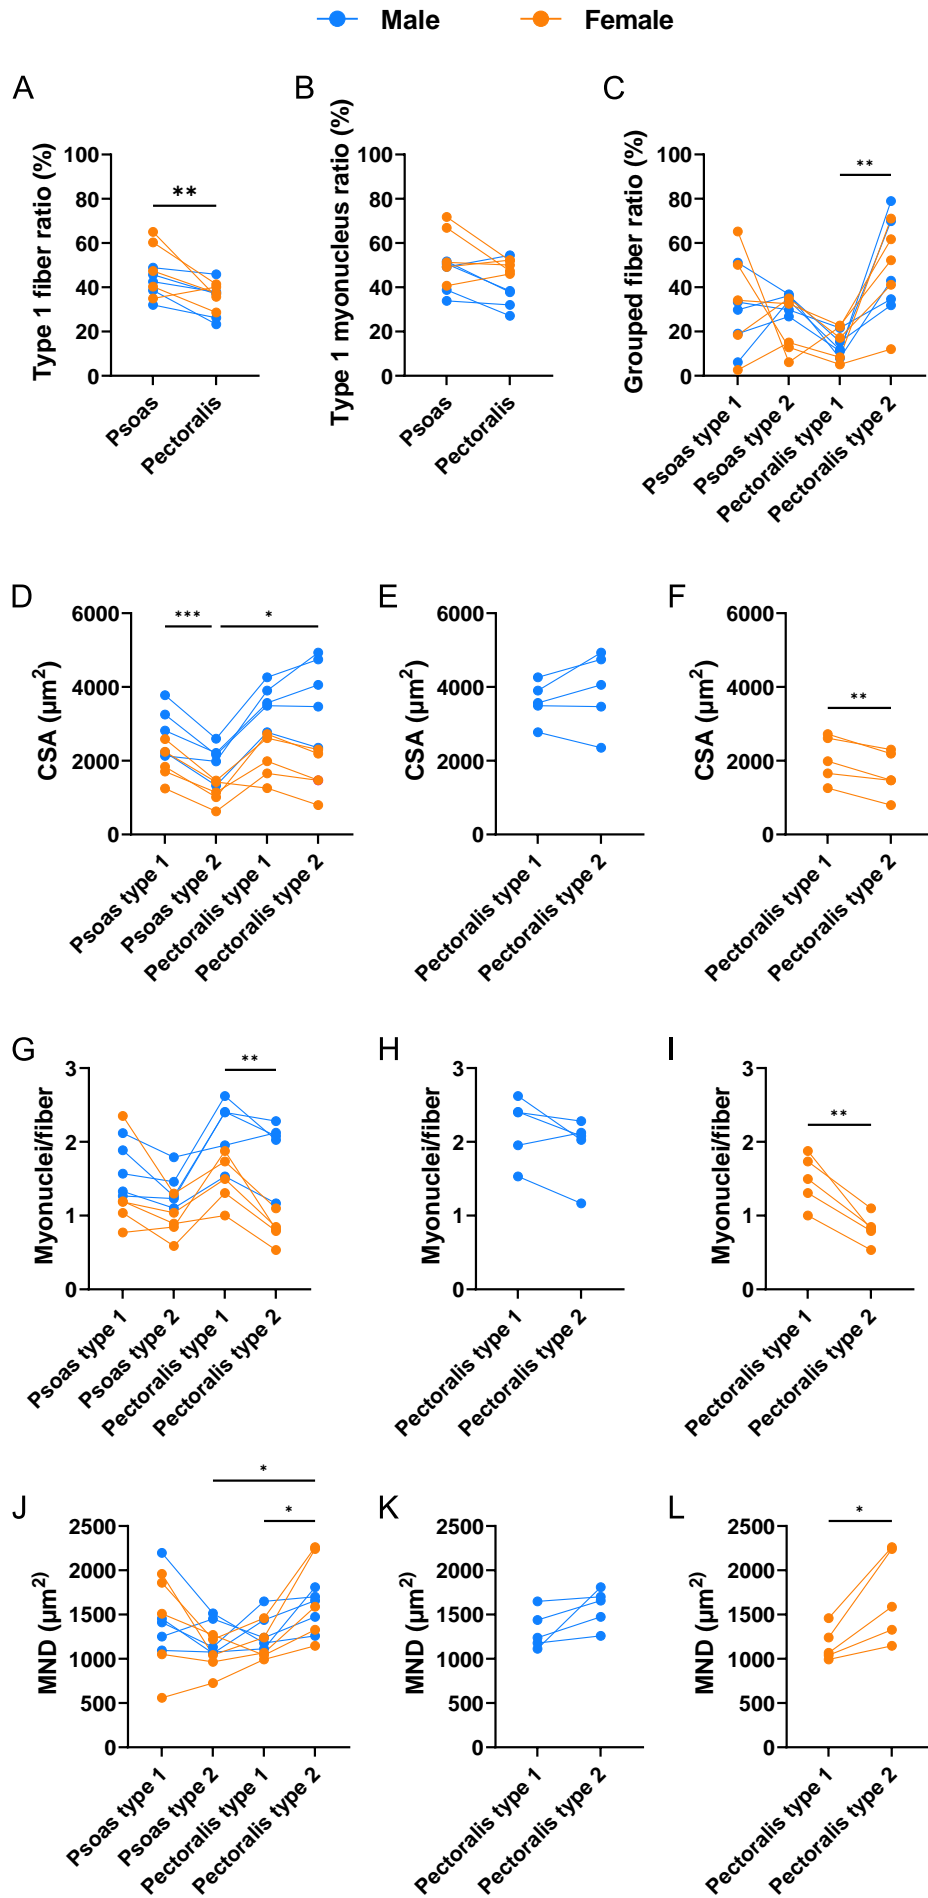

Figure 5

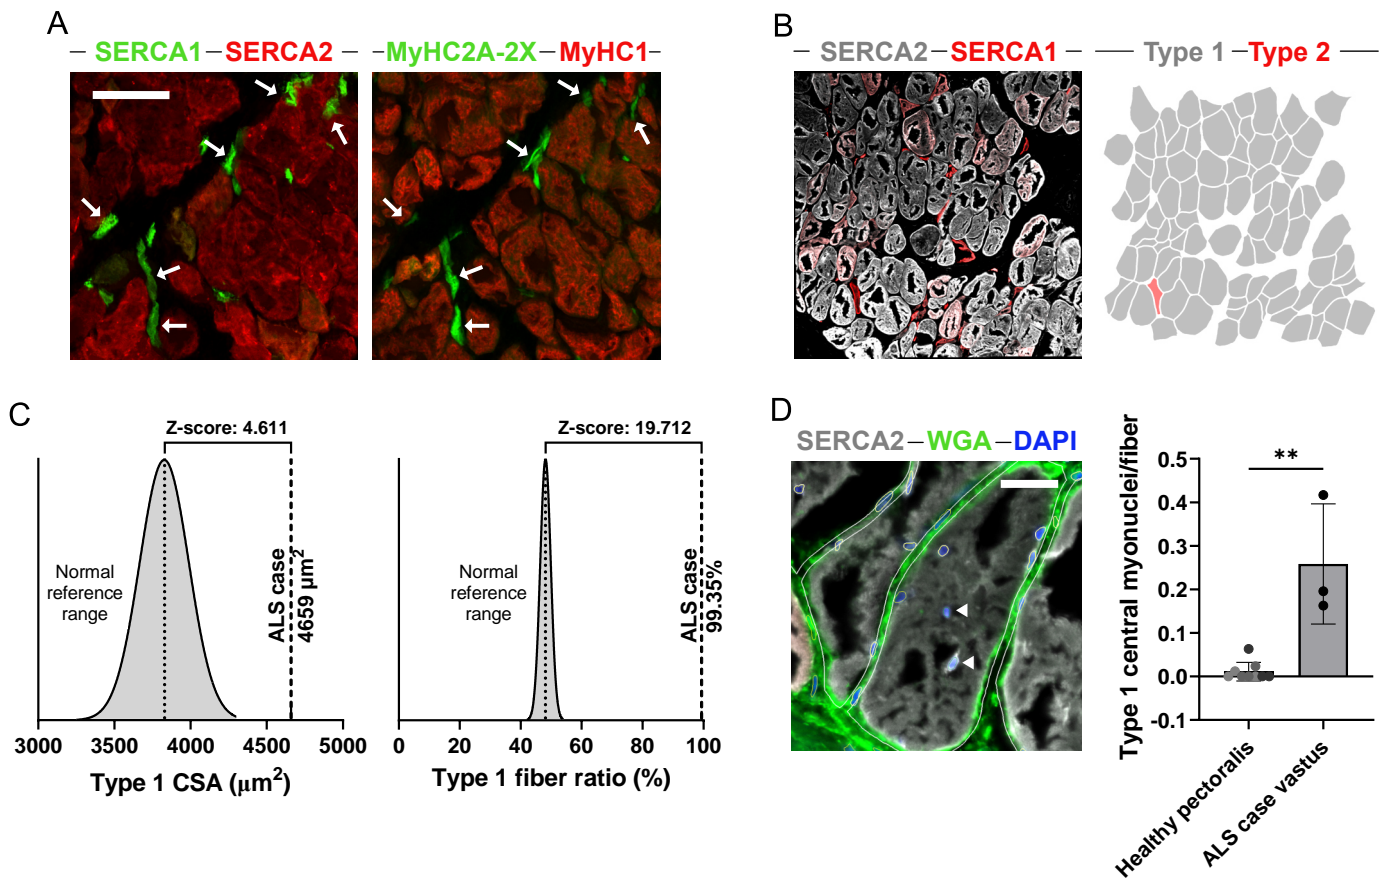

**Figure 6**



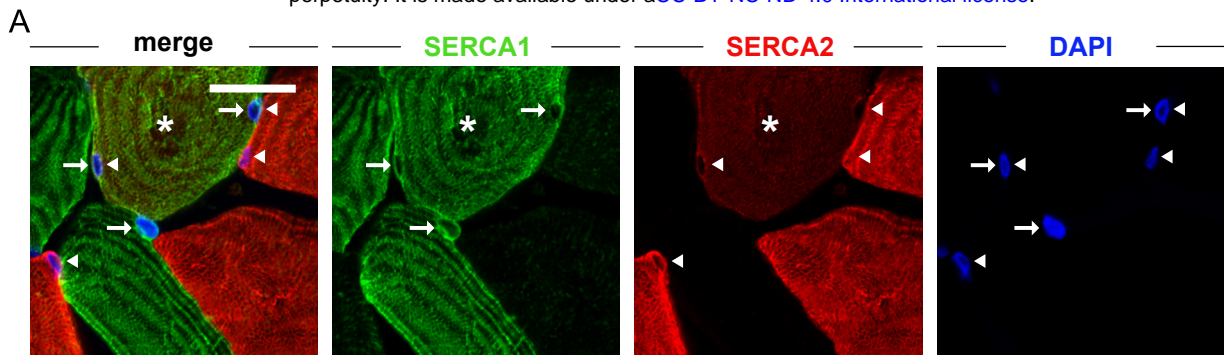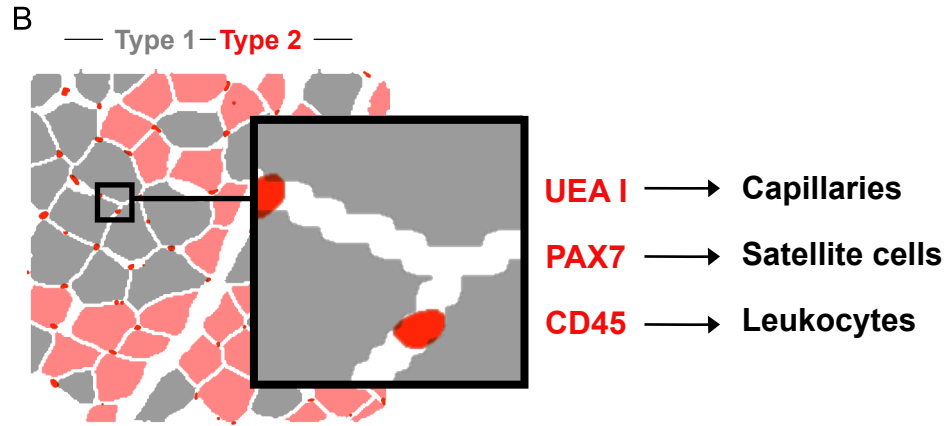

**Figure 7**
